# Supplementary figures and images for: Structure–activity relationships in group 3 metal catalysts for asymmetric intramolecular alkene hydroamination. An investigation of ligands based on the axially chiral 1,1′-binaphthyl-2,2′-diamine motif
Source: Royal Society of Chemistry journal article supplement (doi:10.1039/c1dt10222b), 2011-01-01

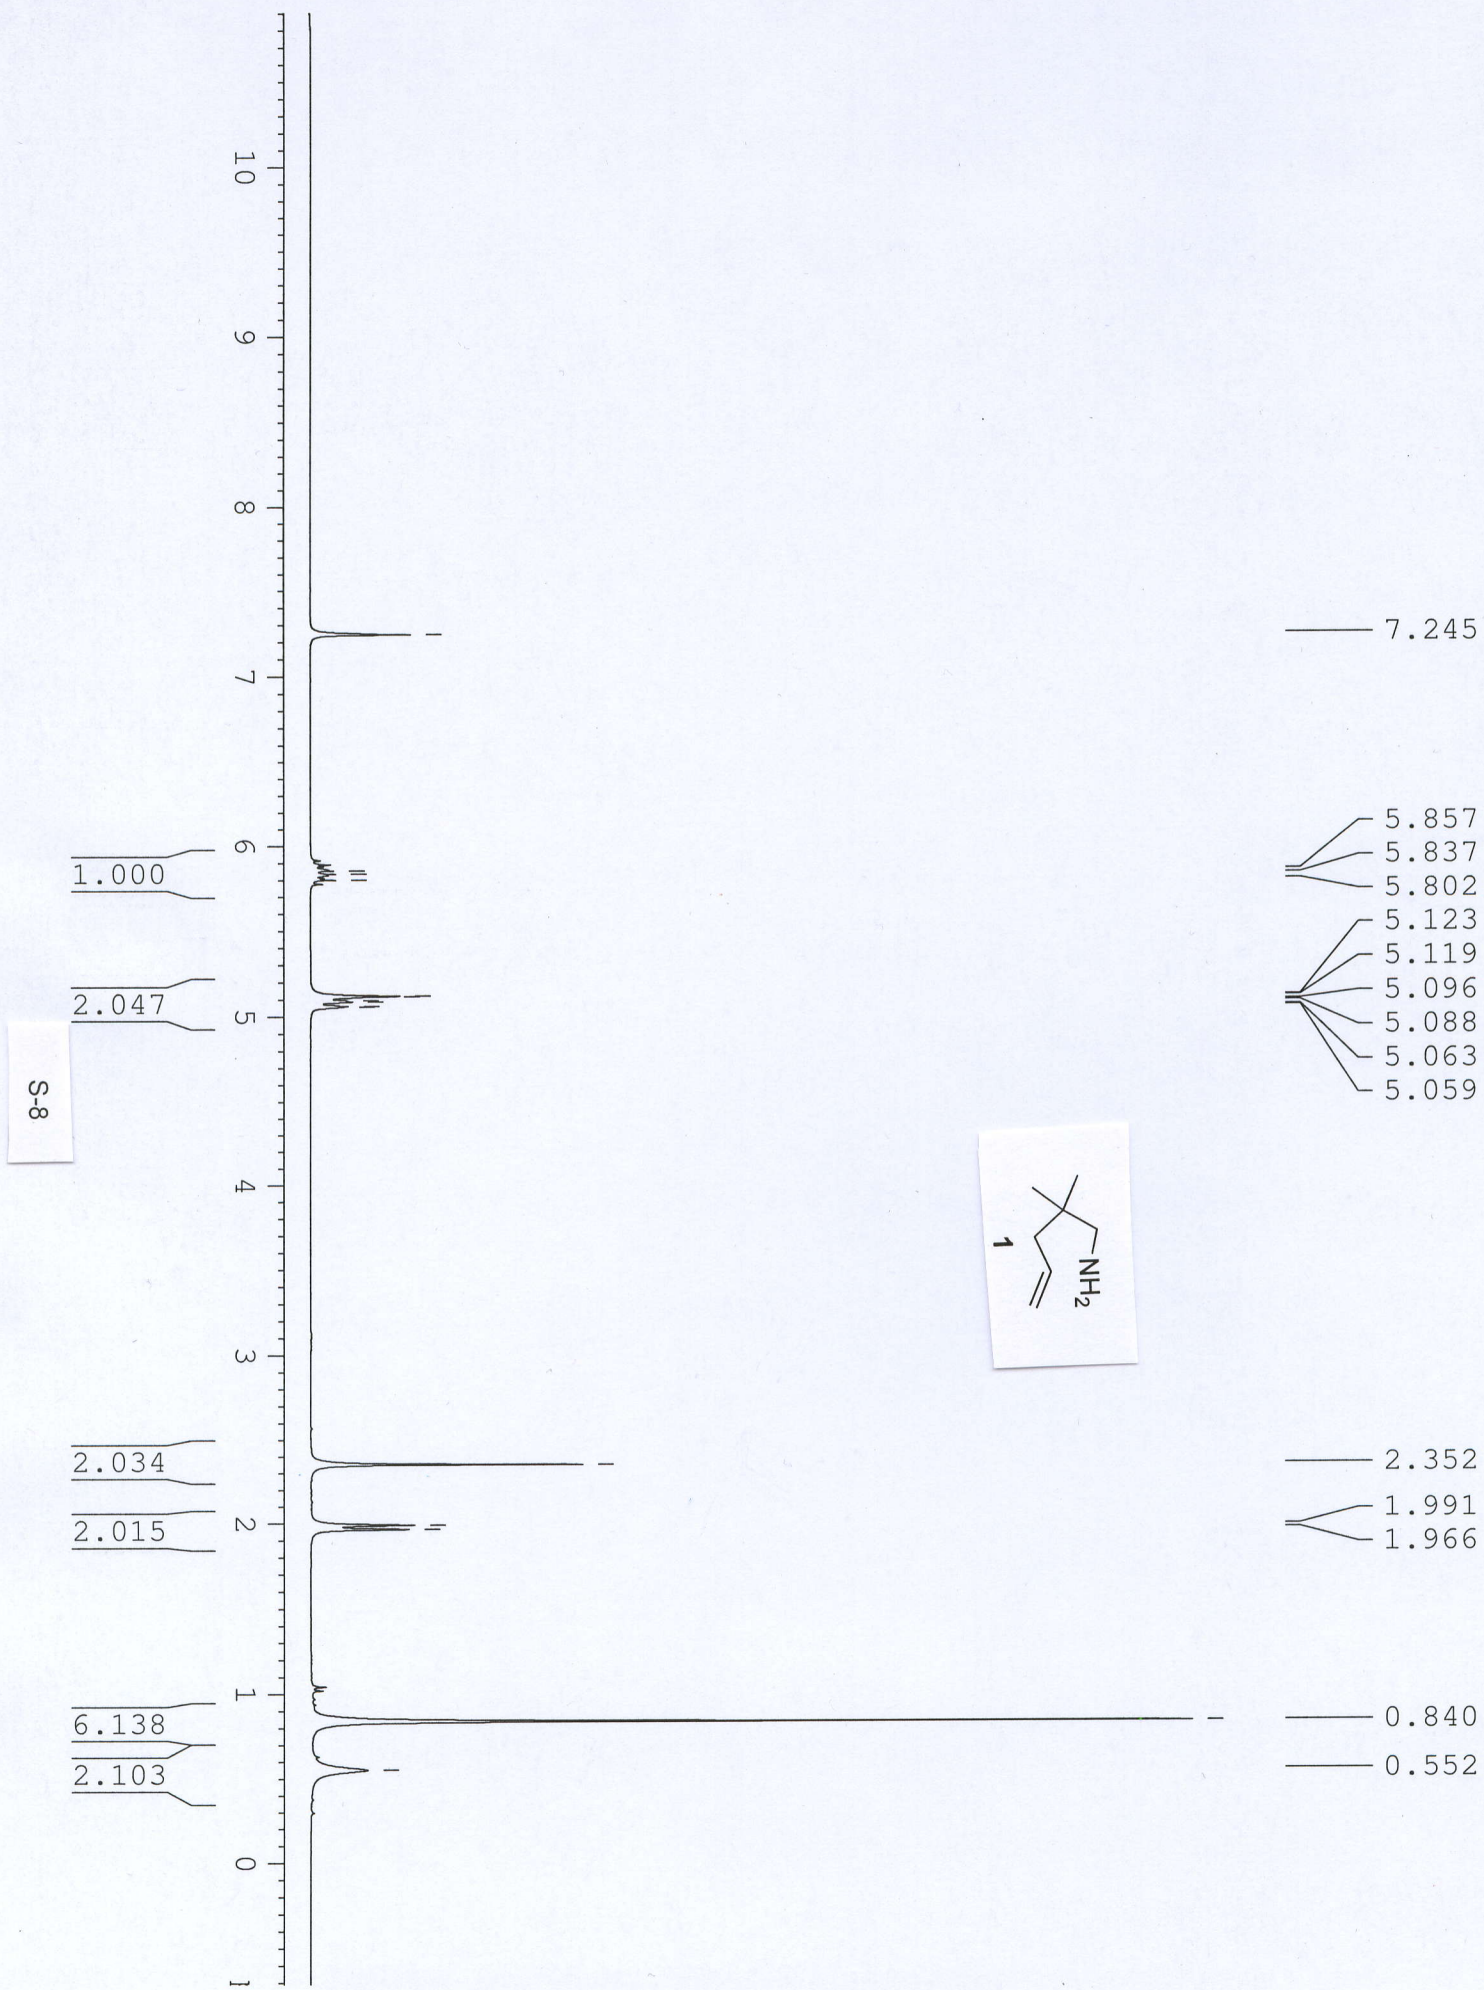

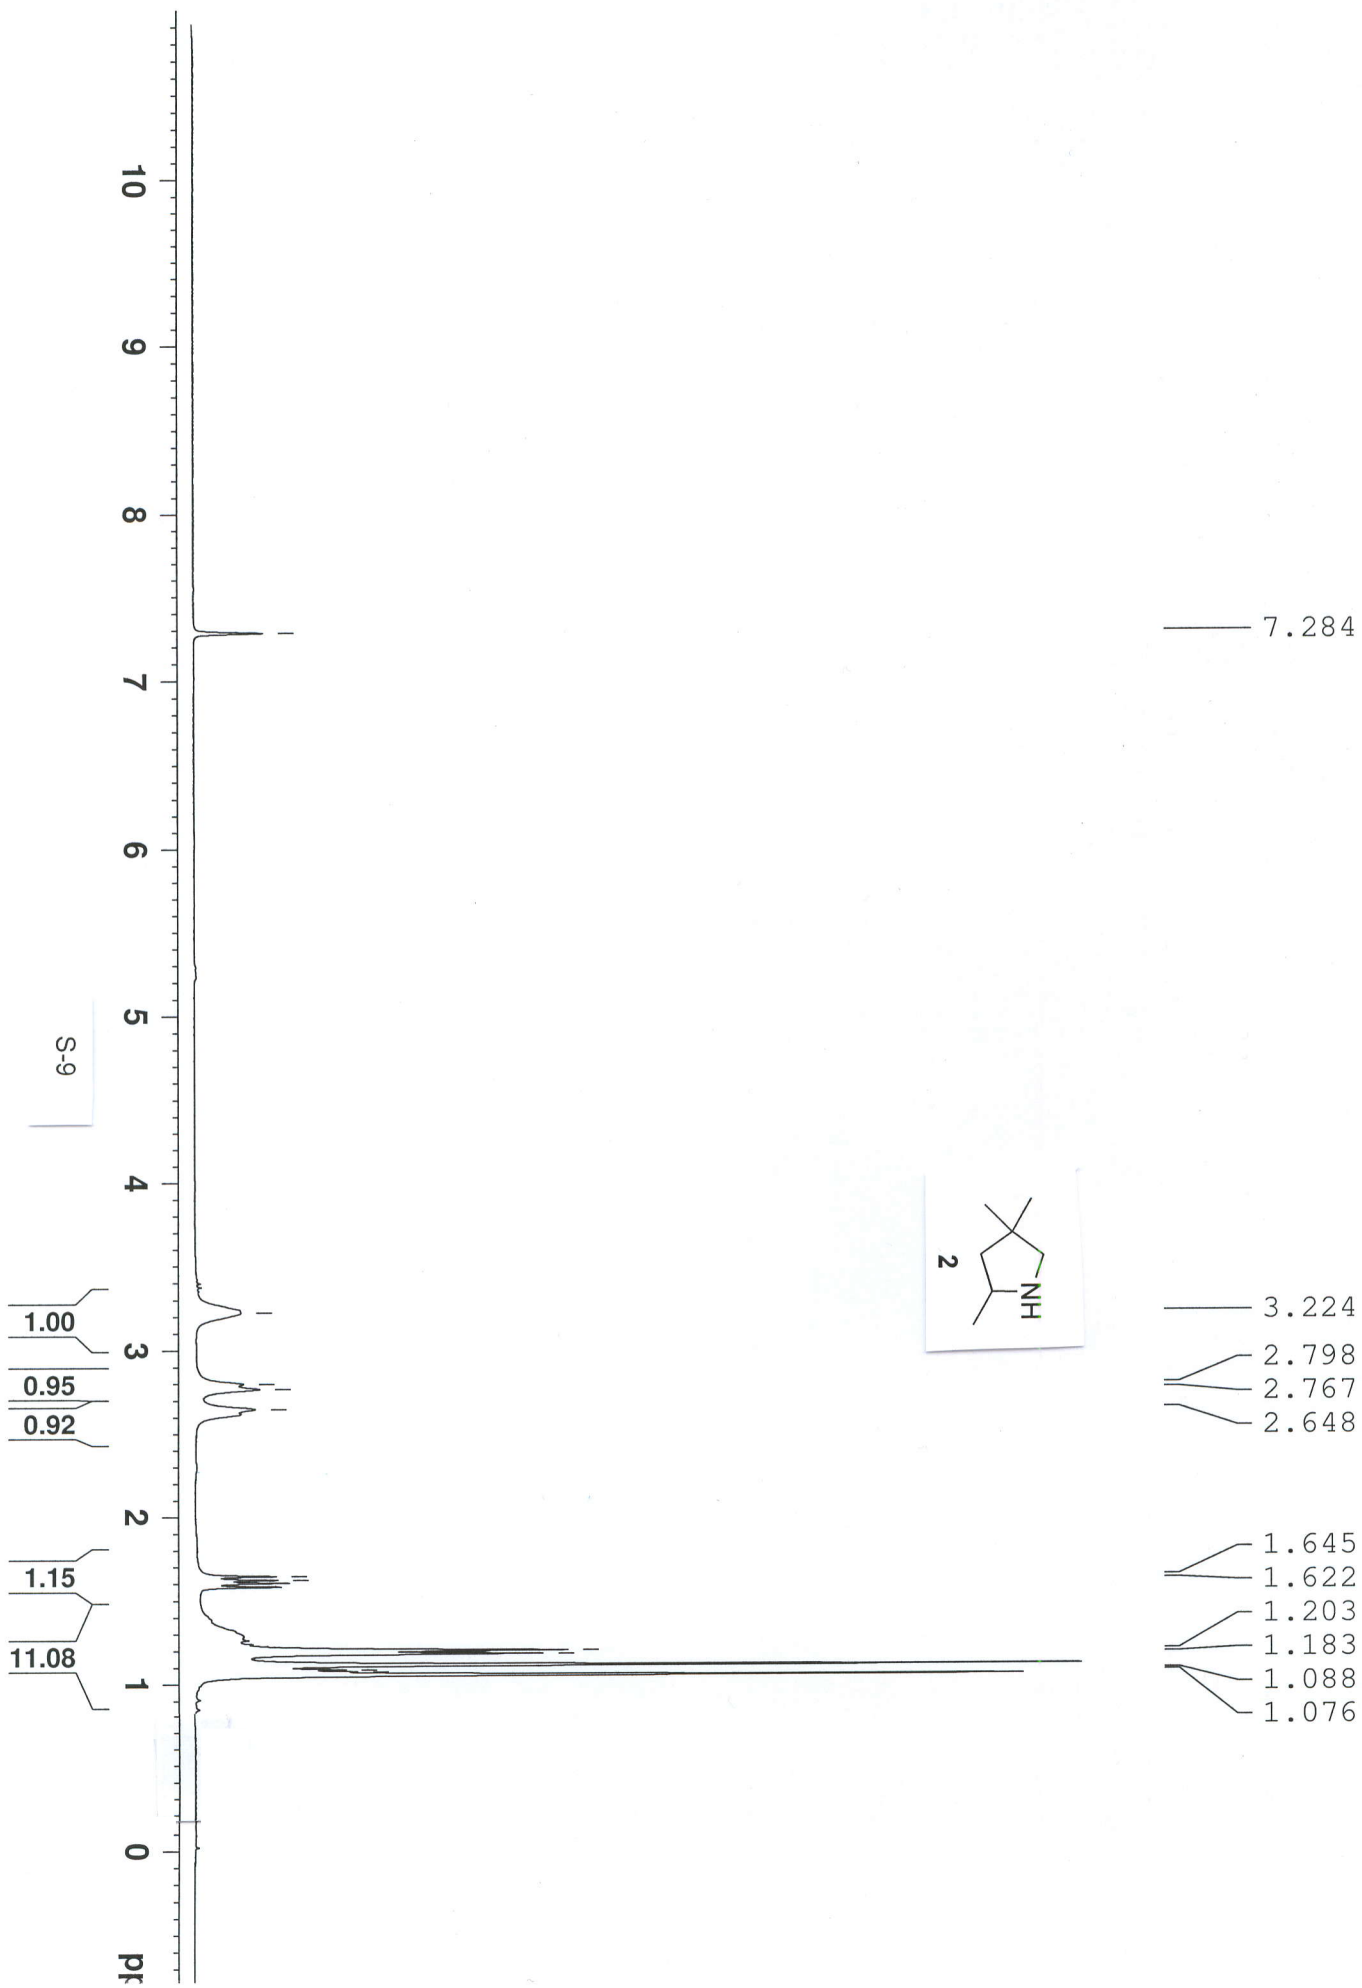

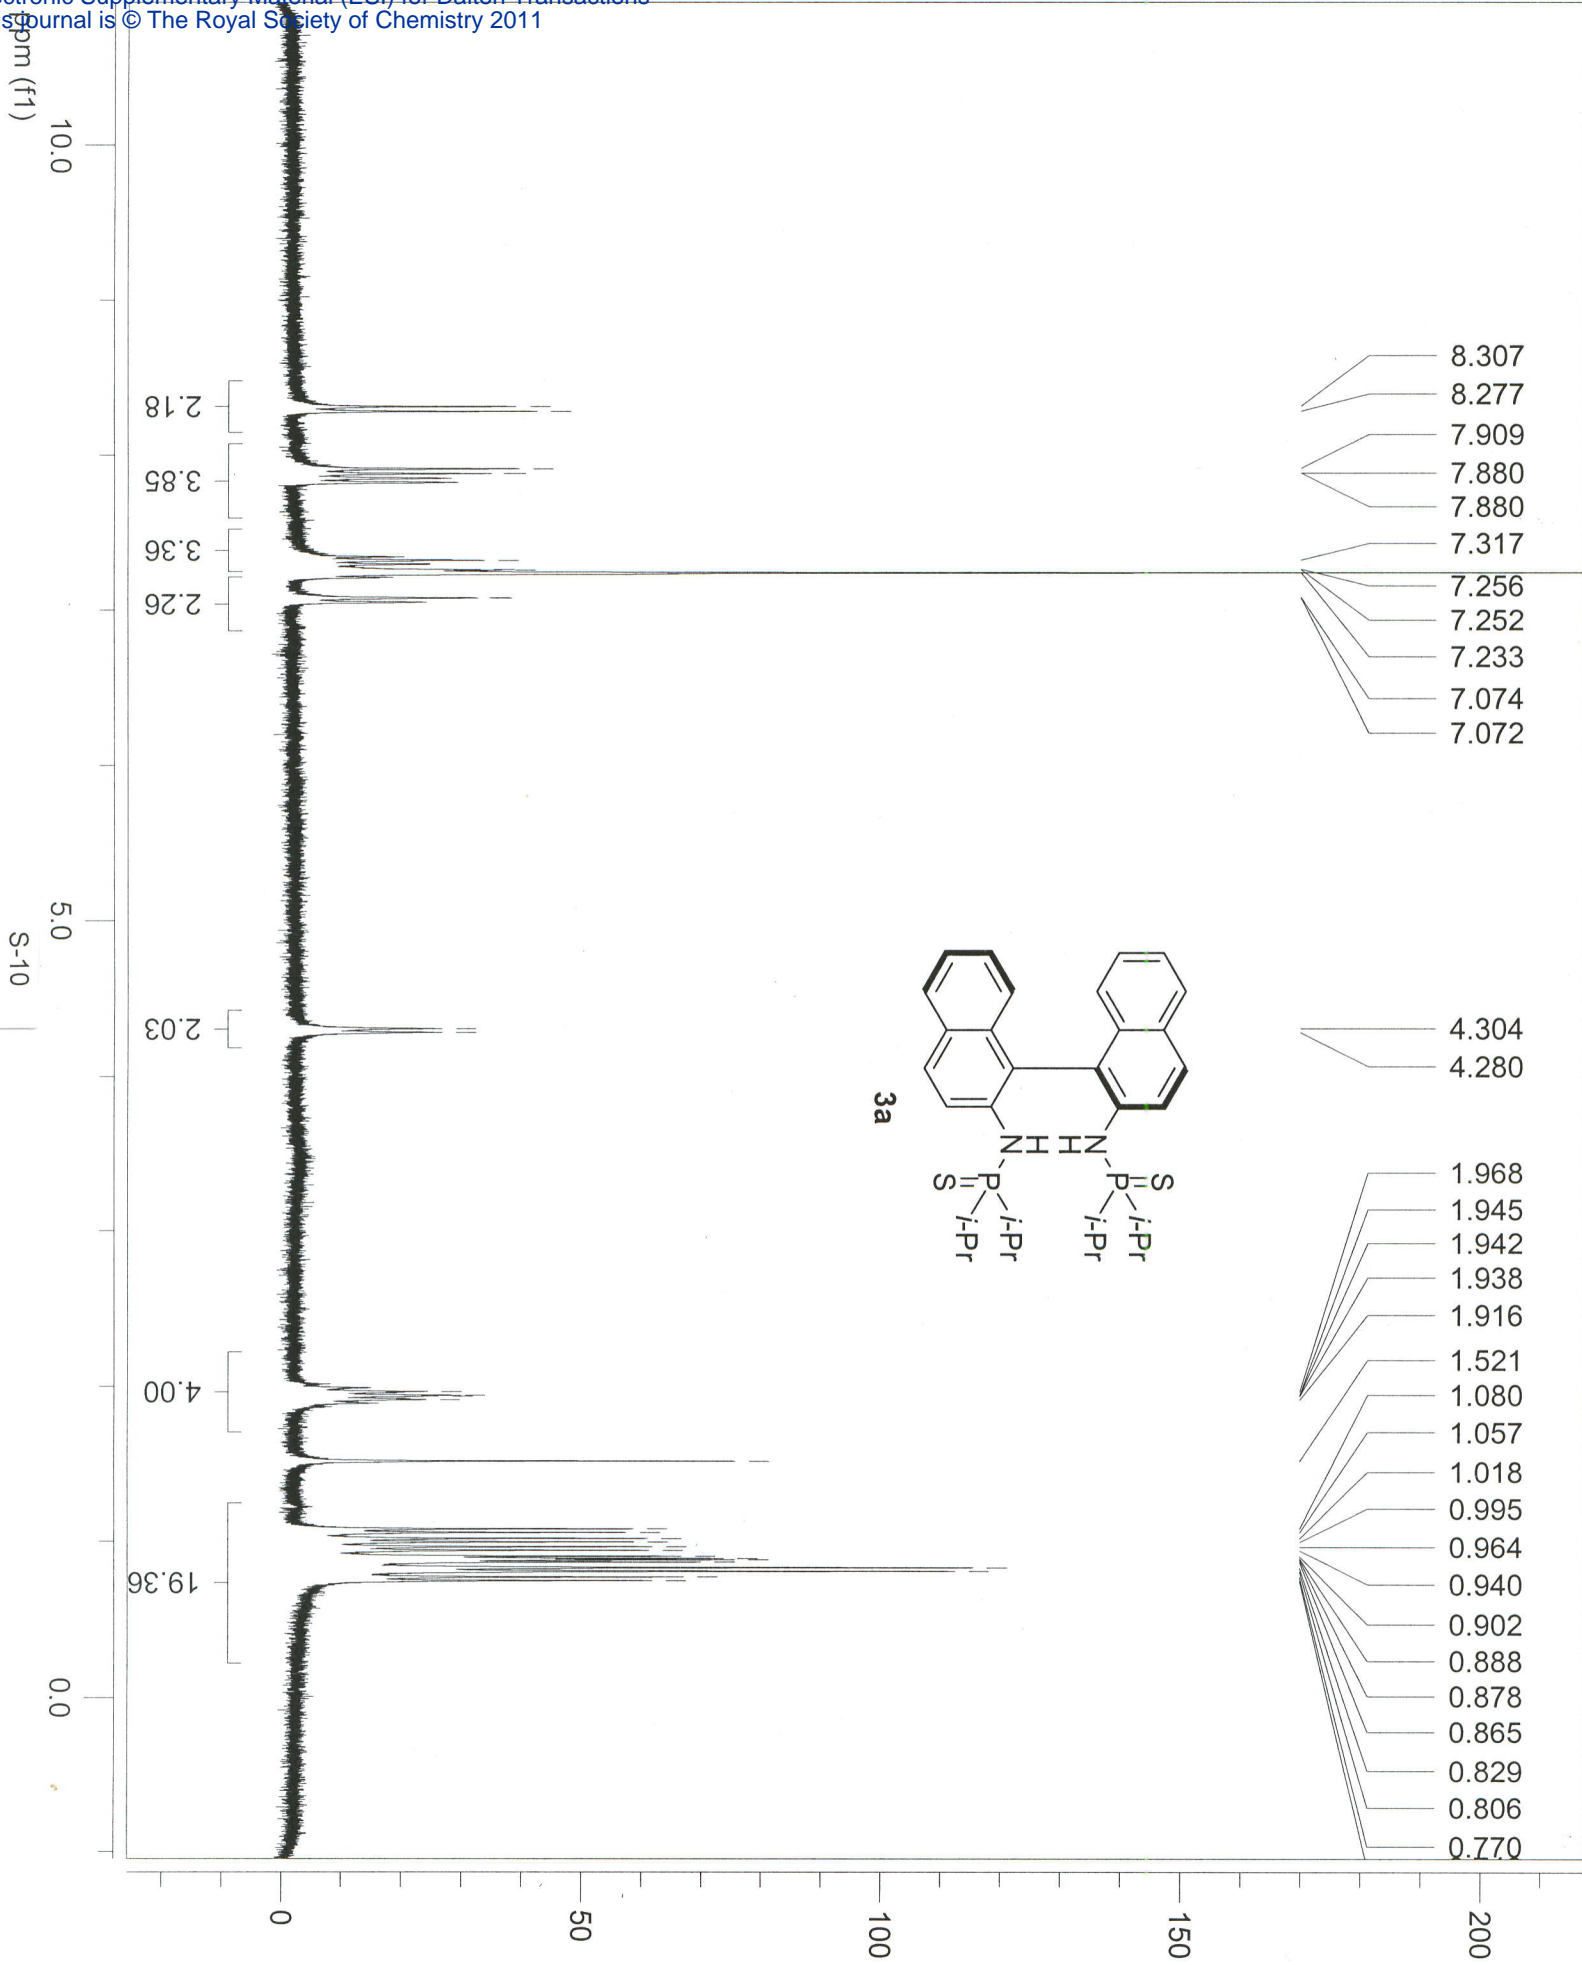

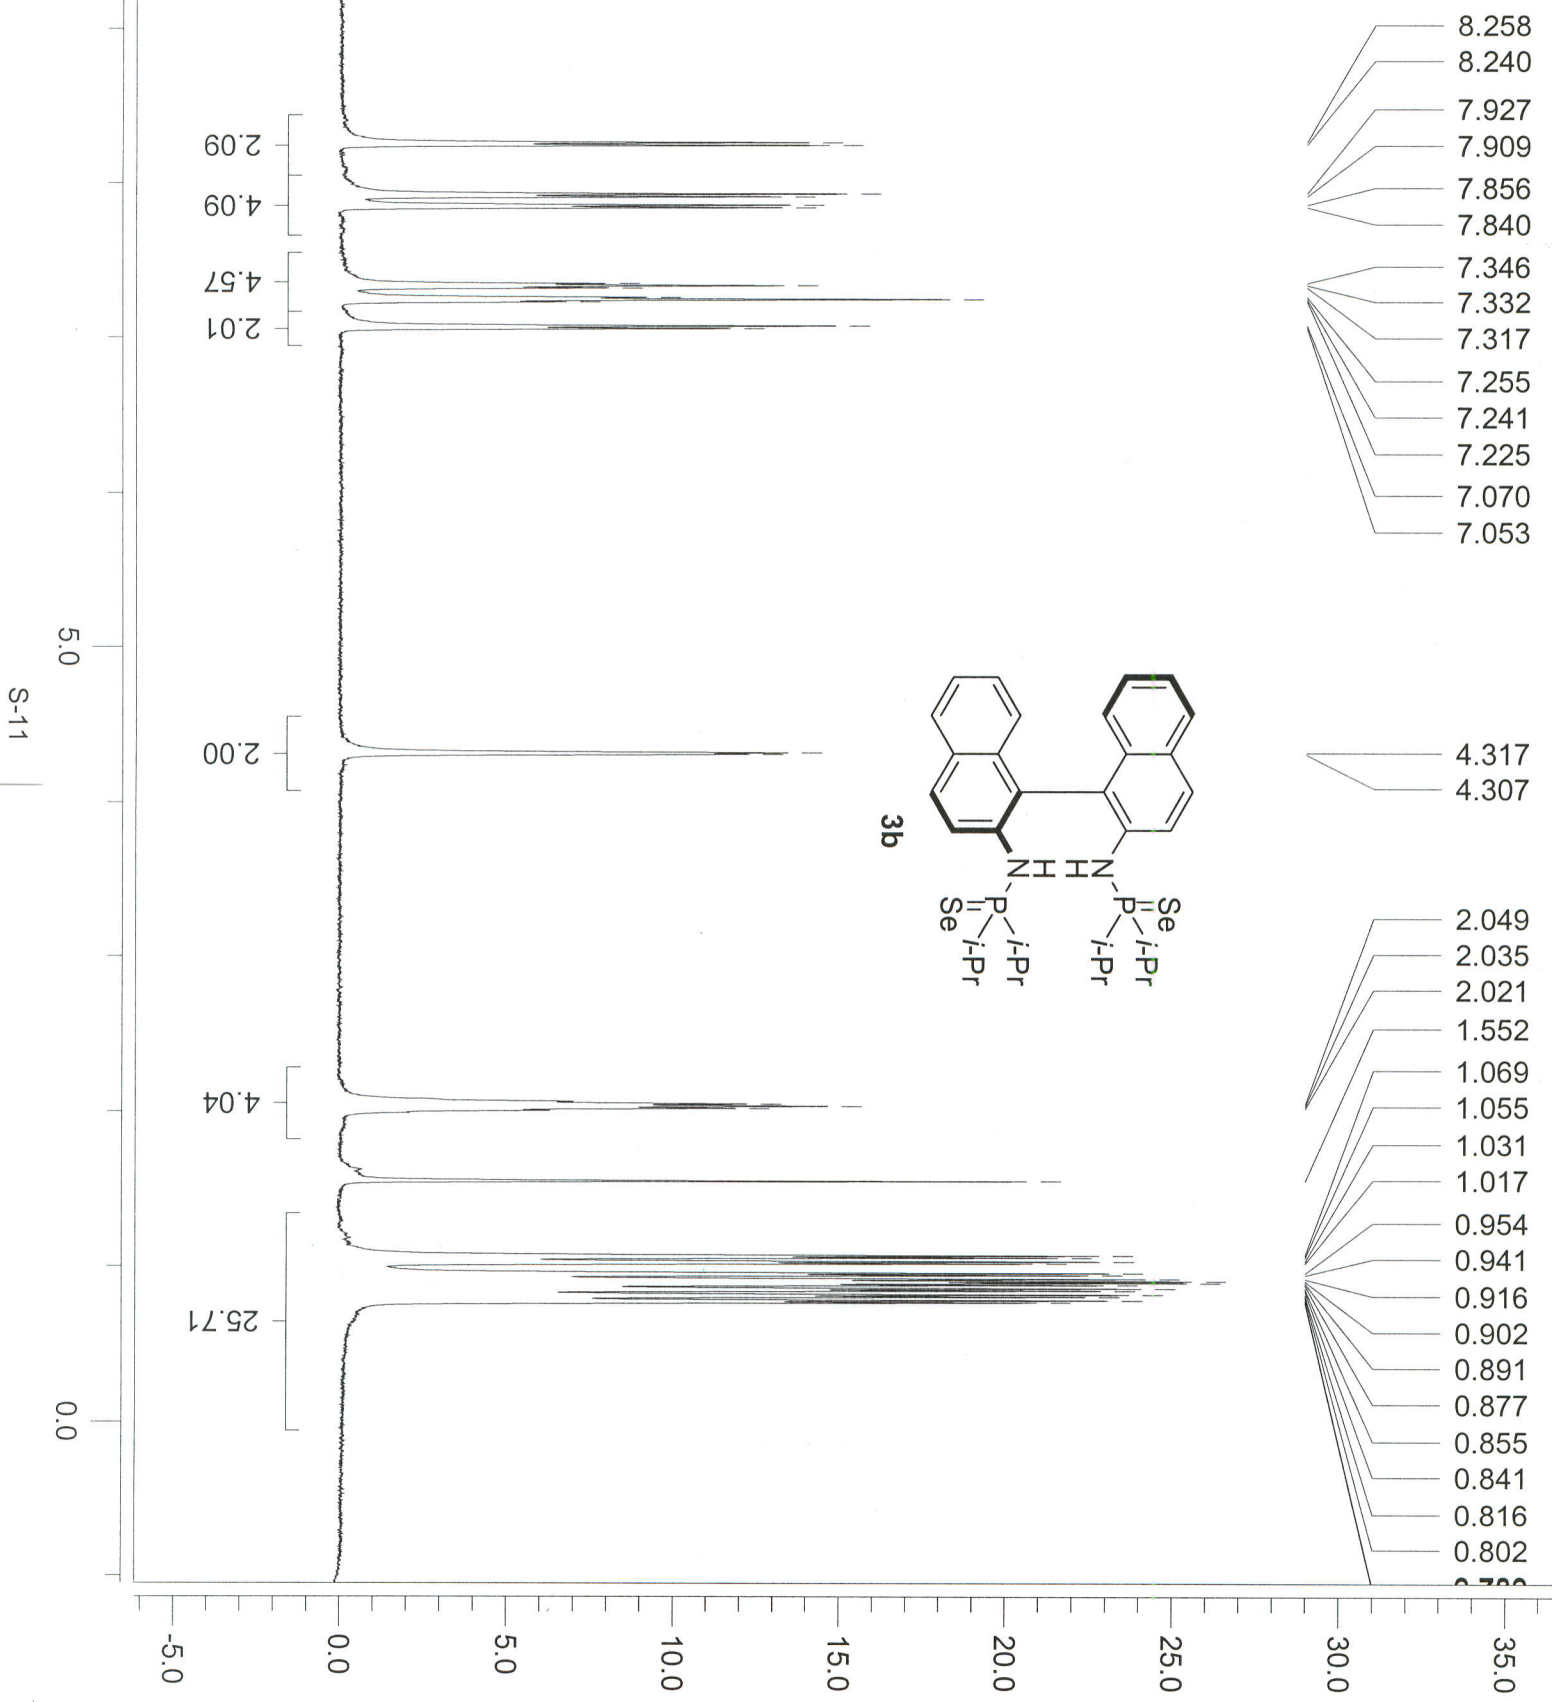

S-11

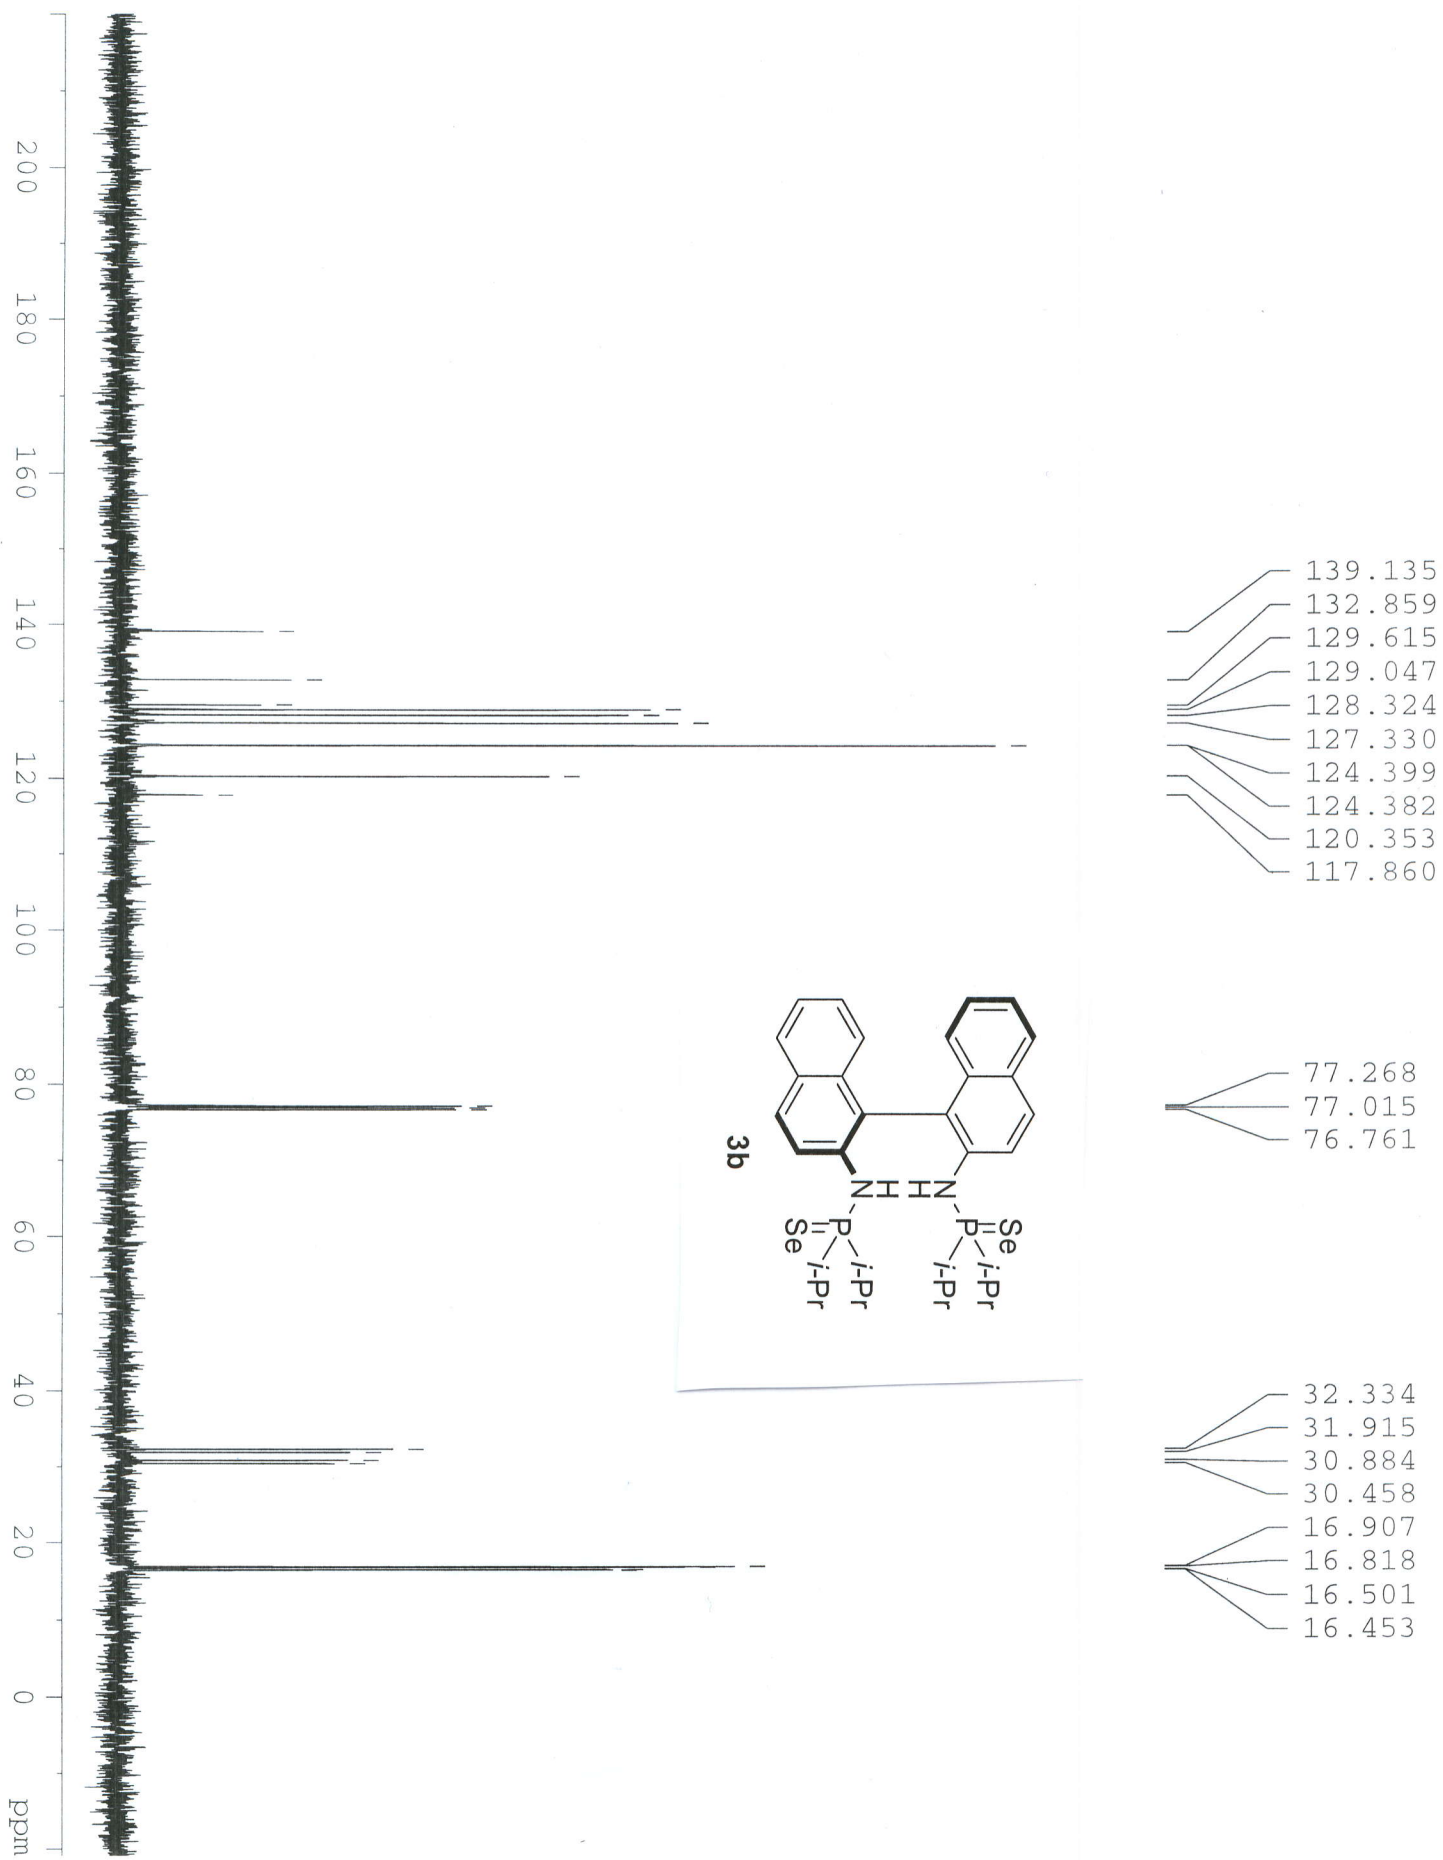

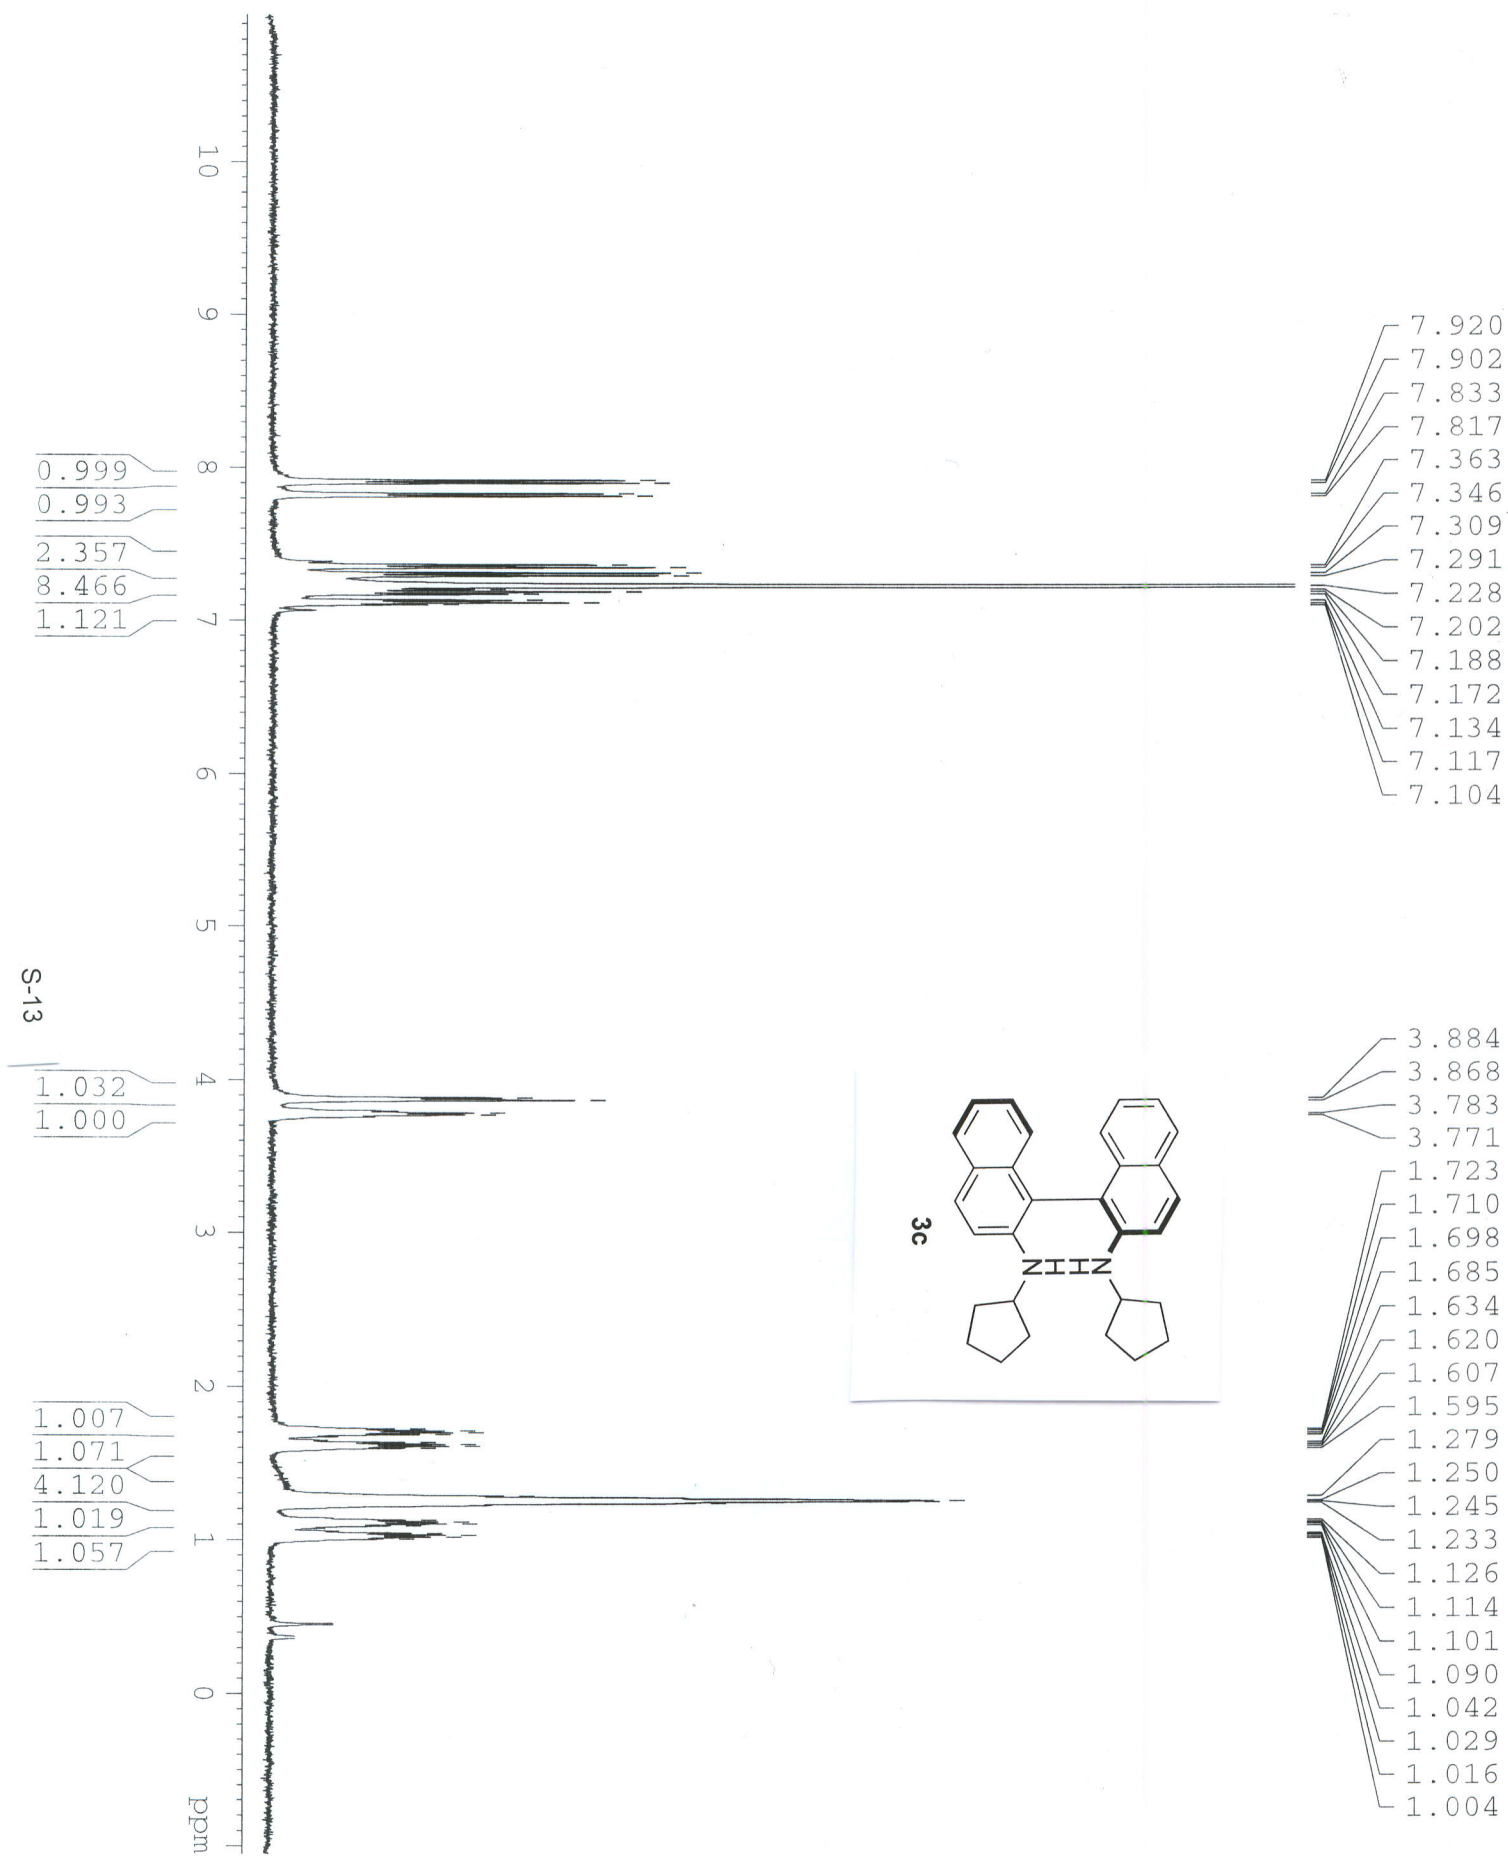

S-13

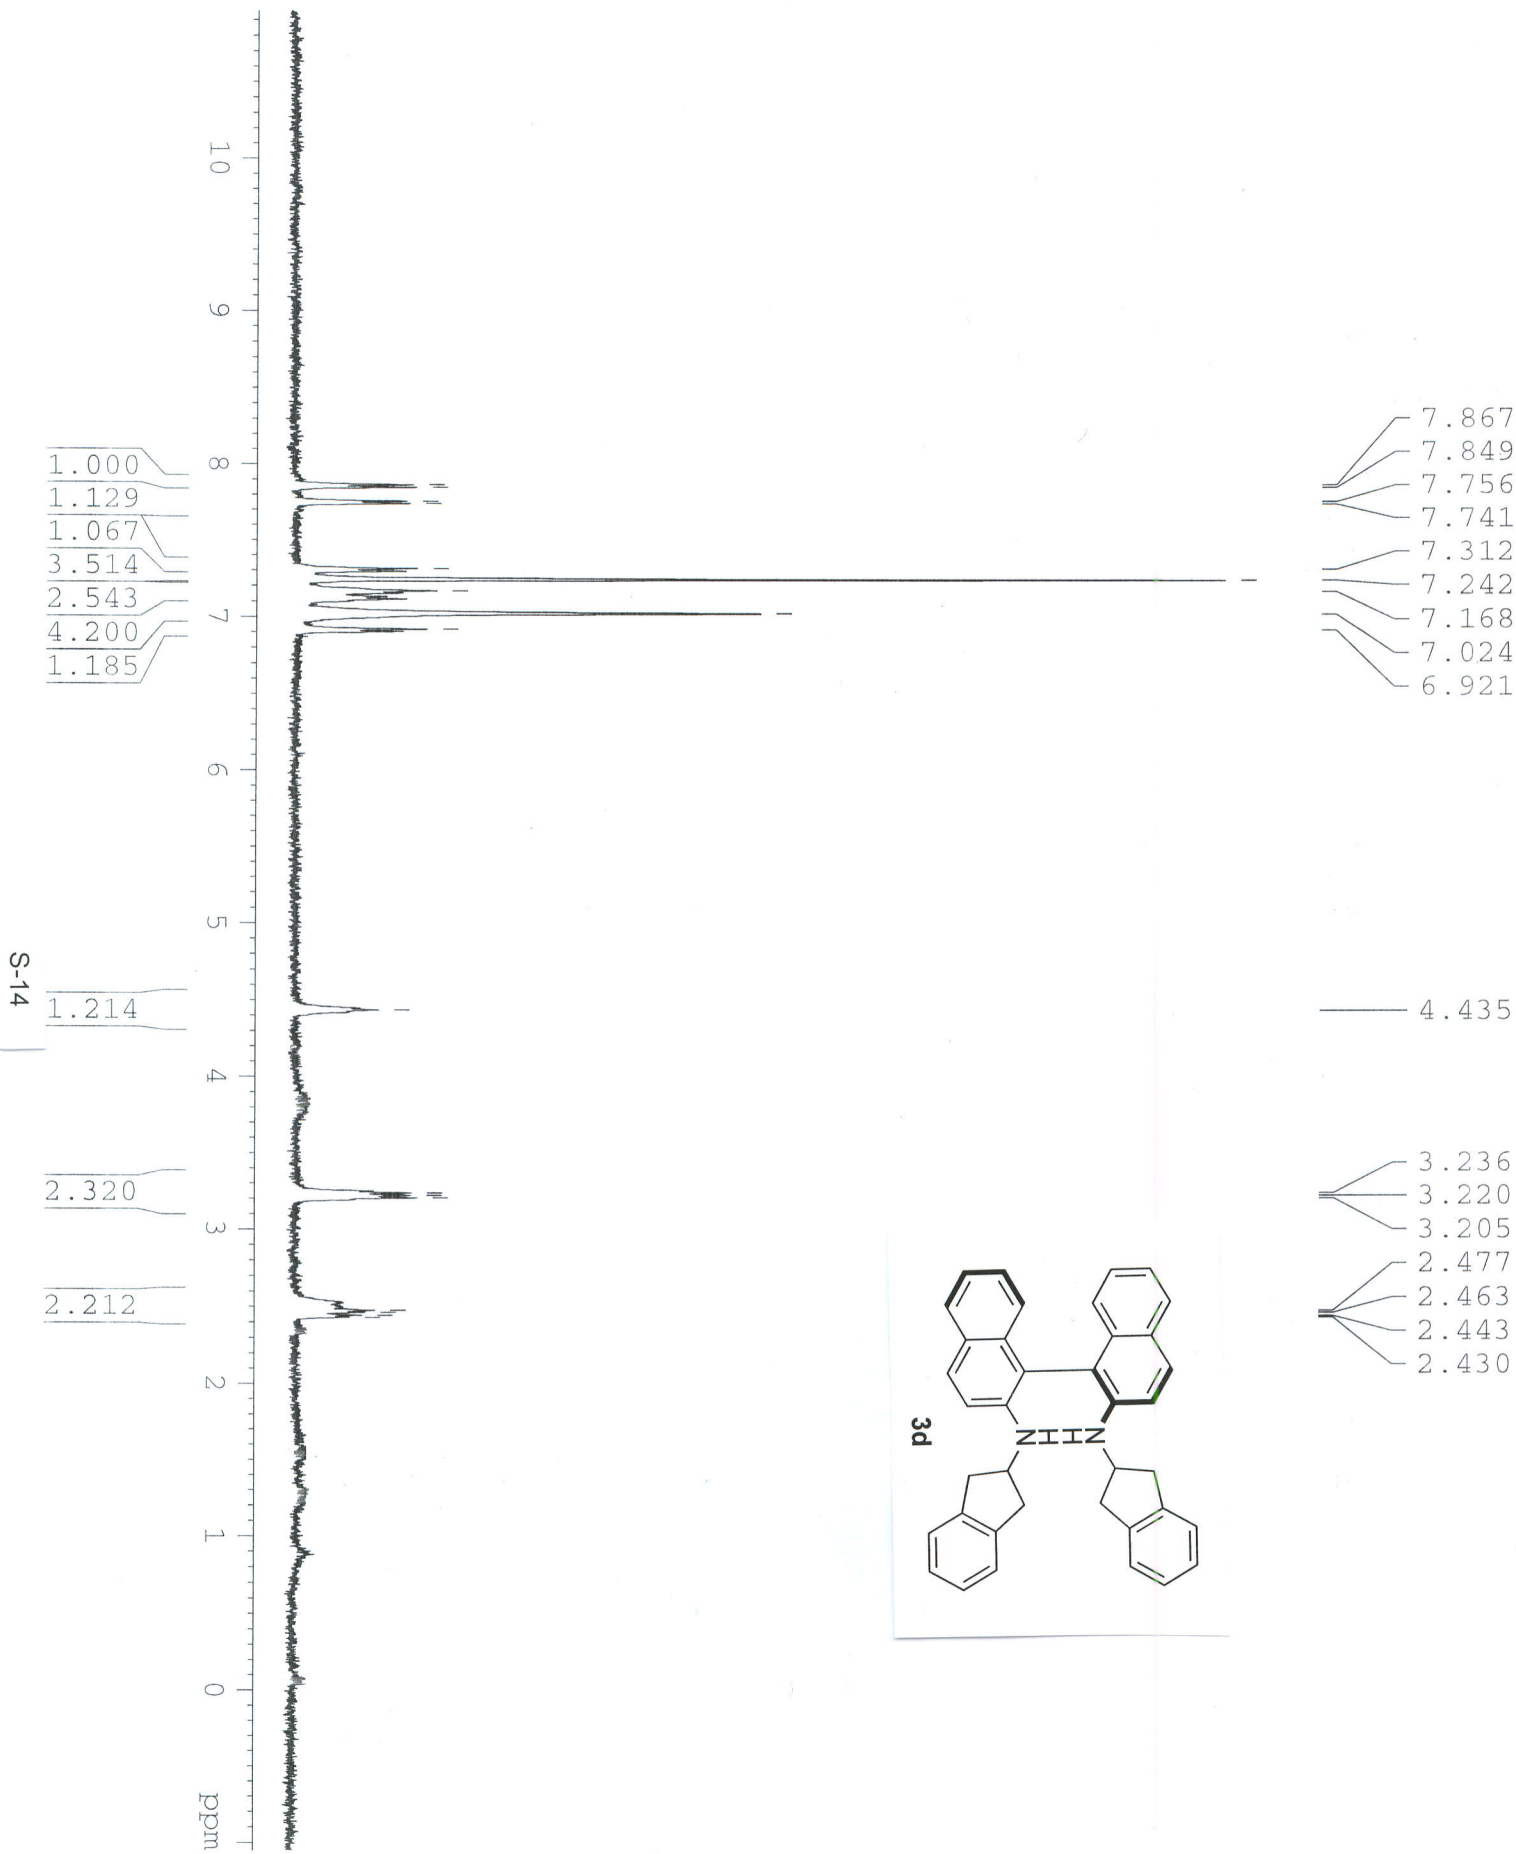

S-15

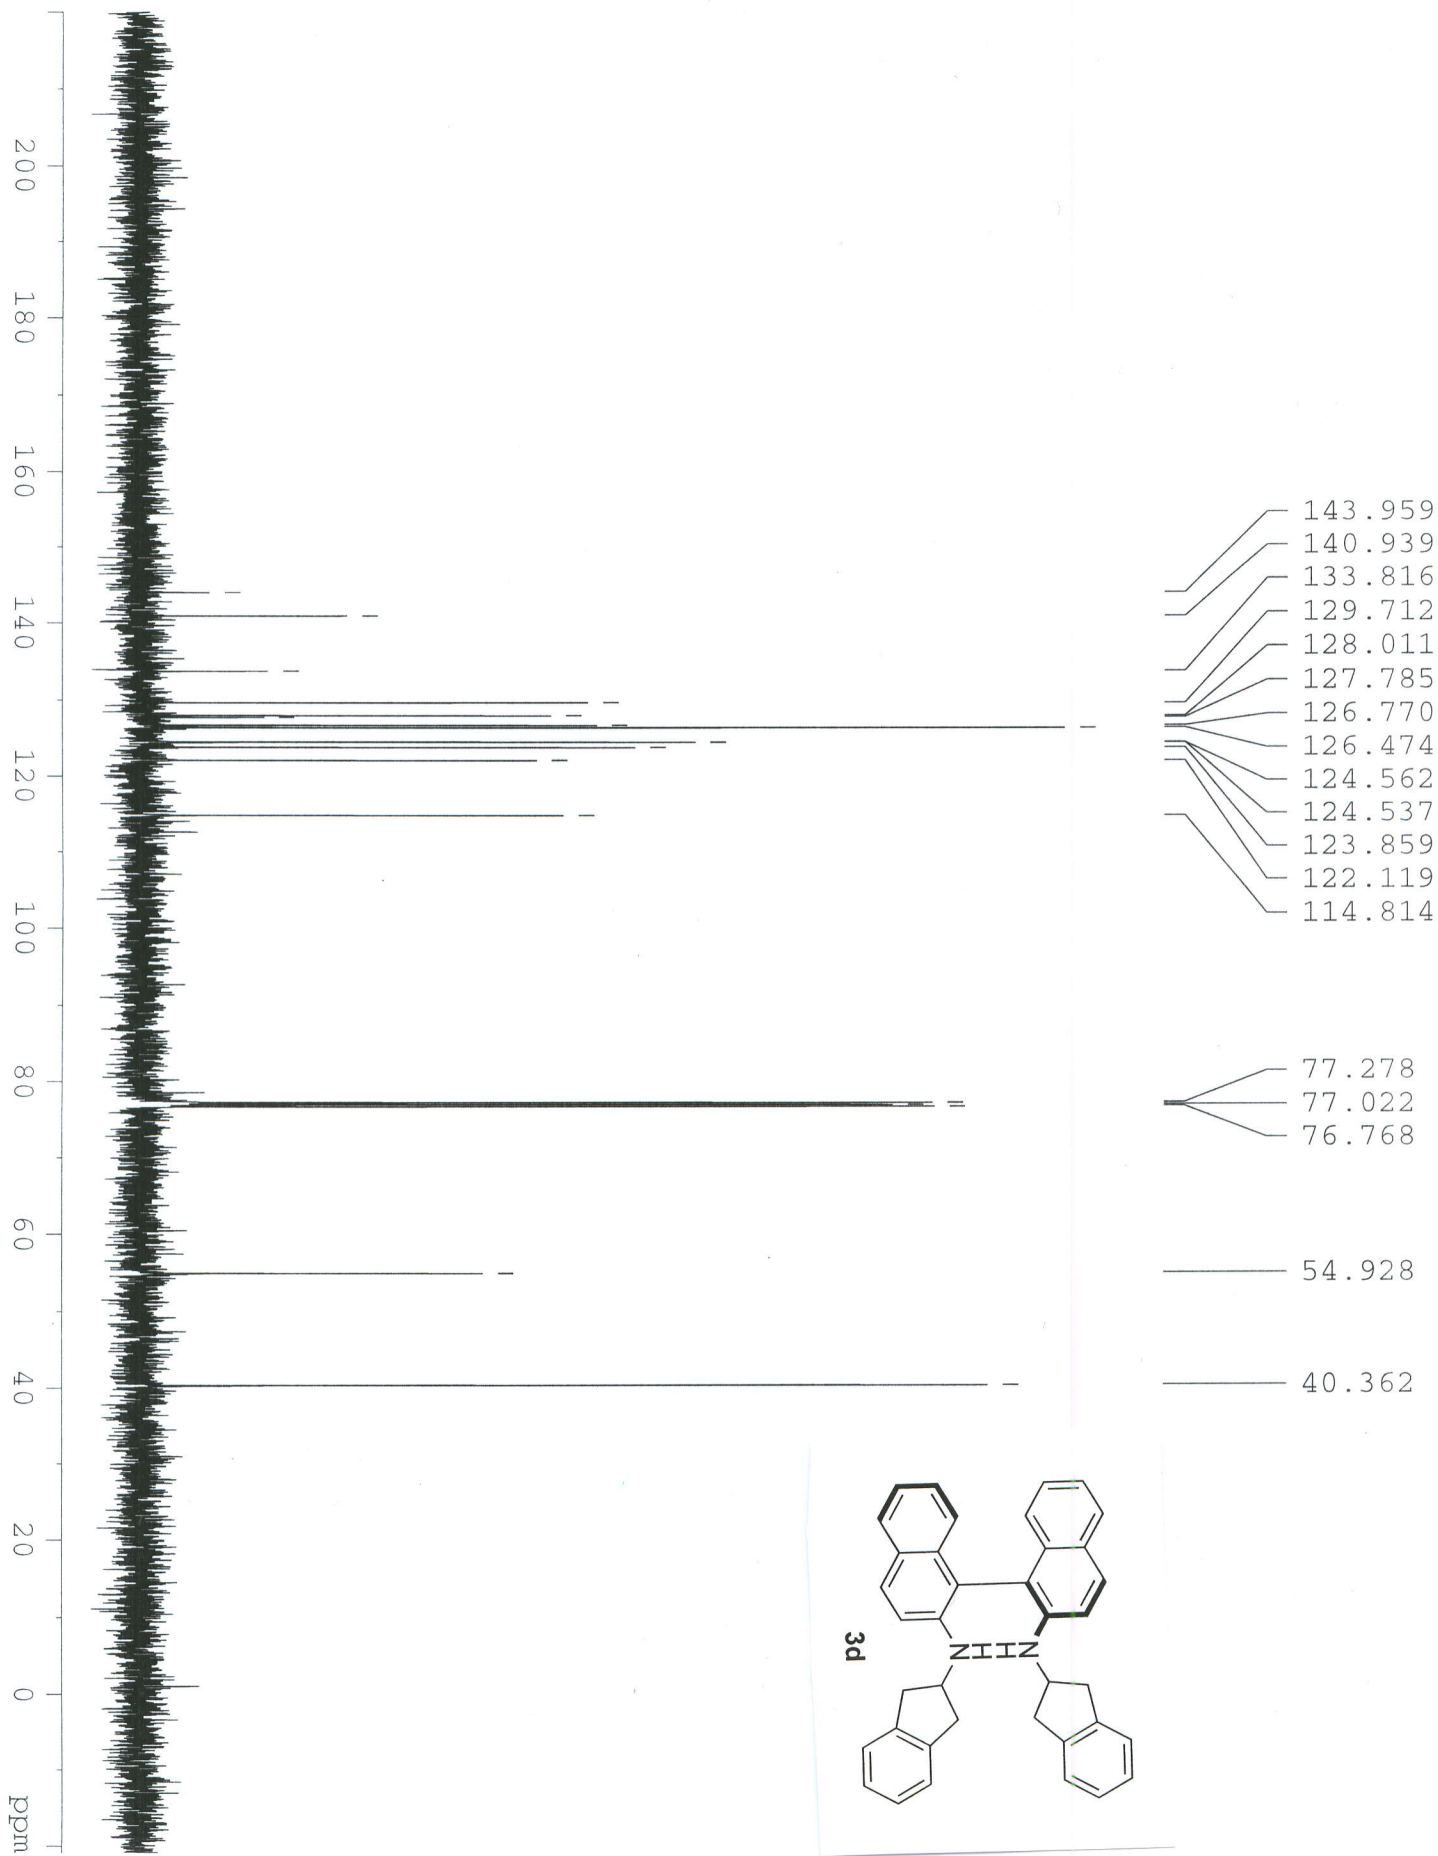



S-16

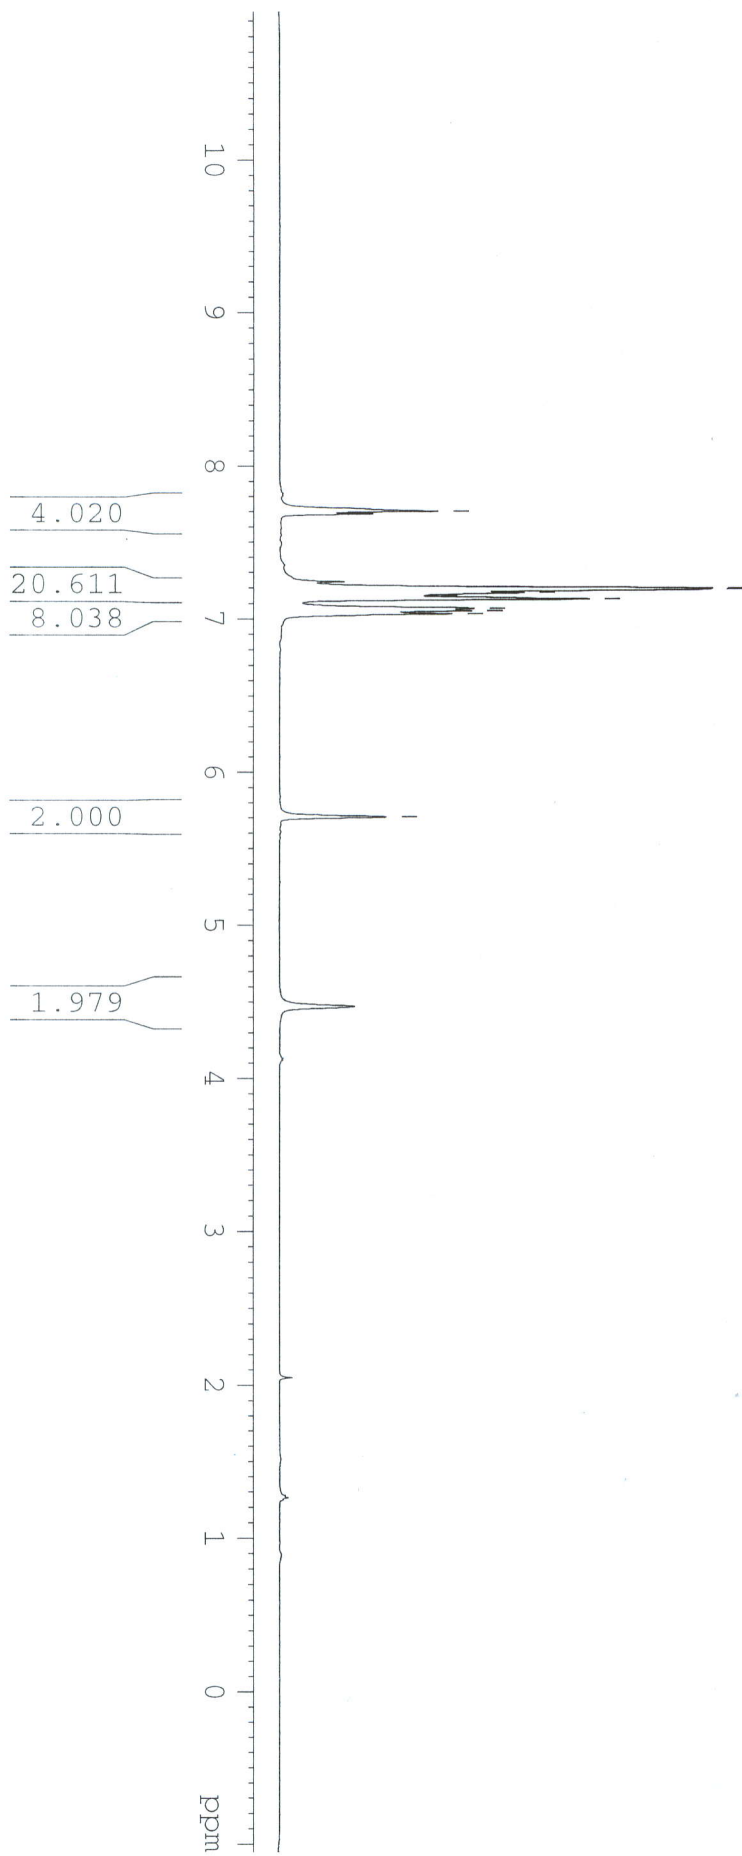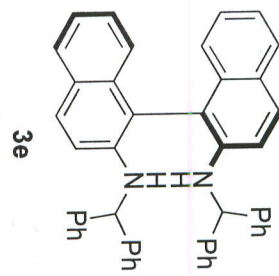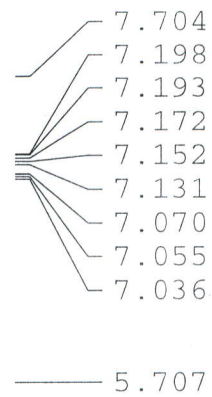

S-17

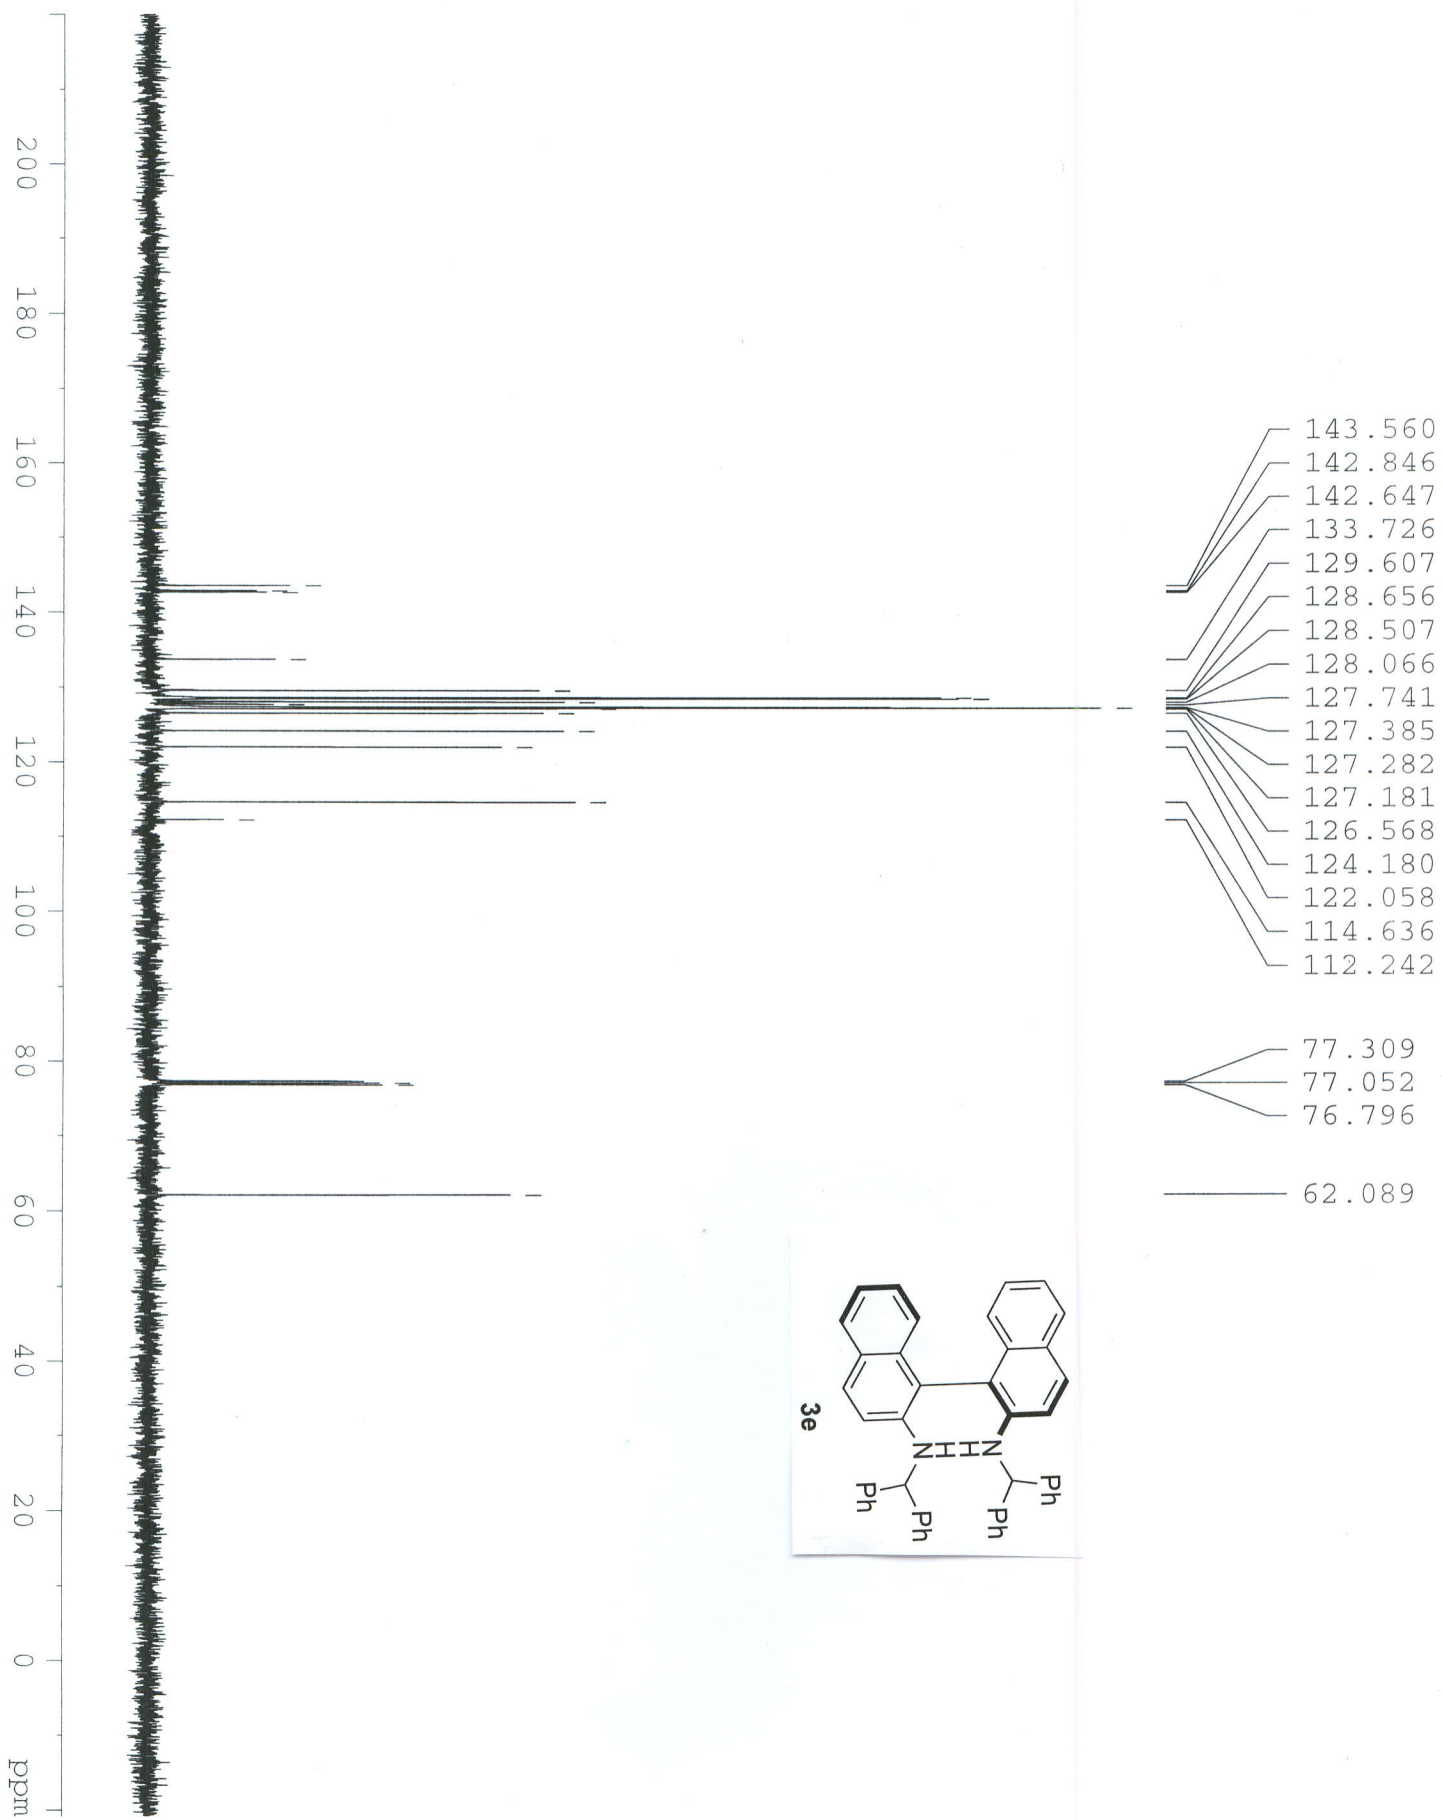

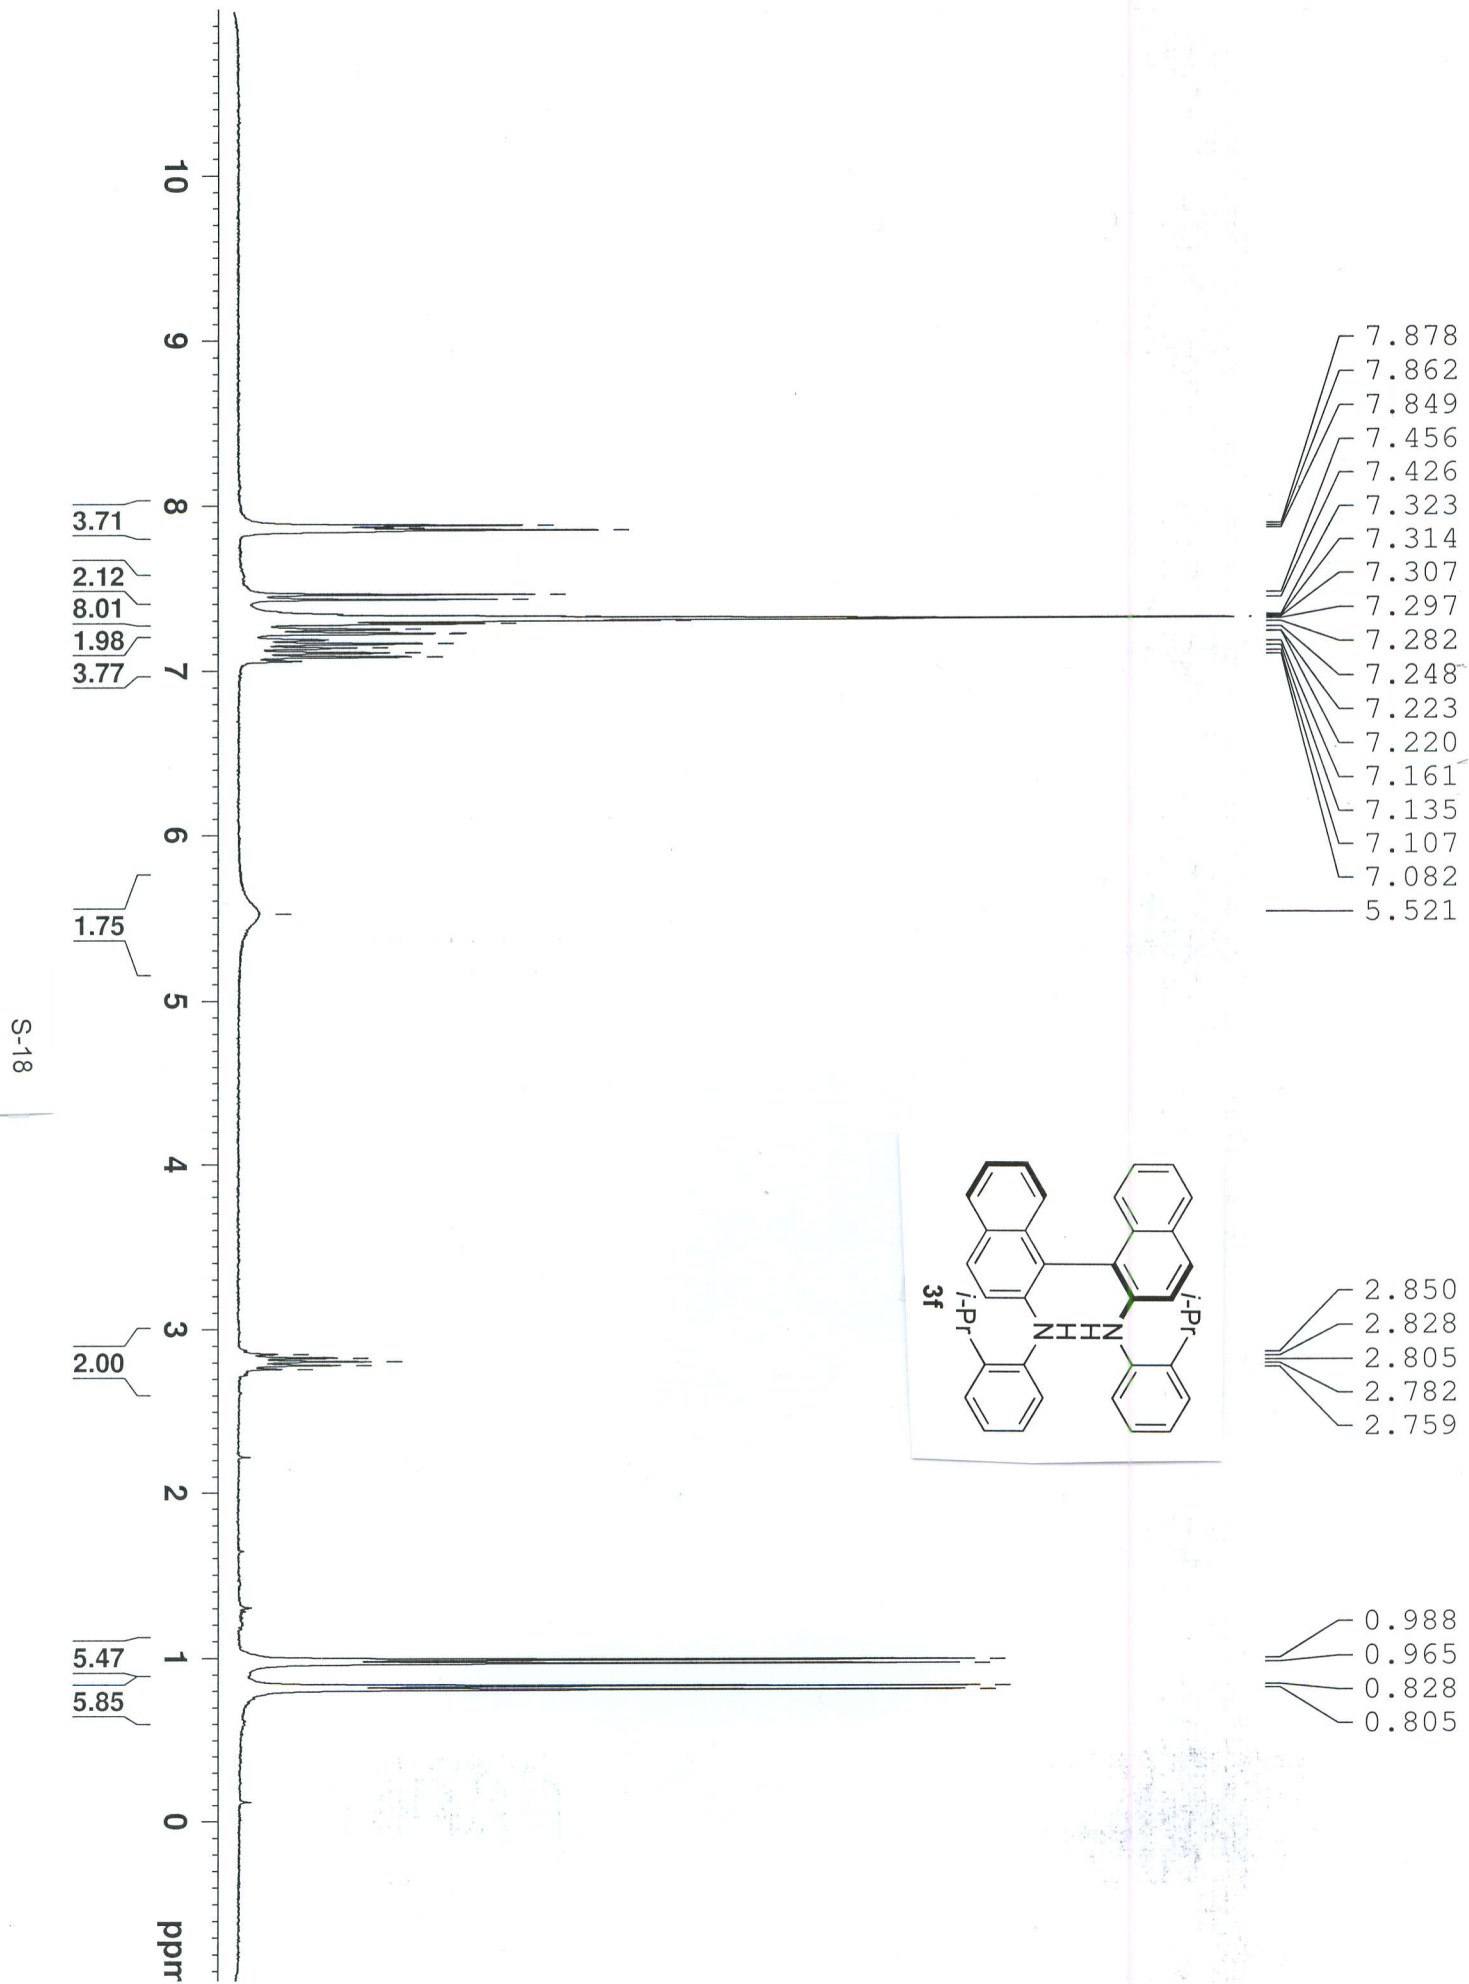

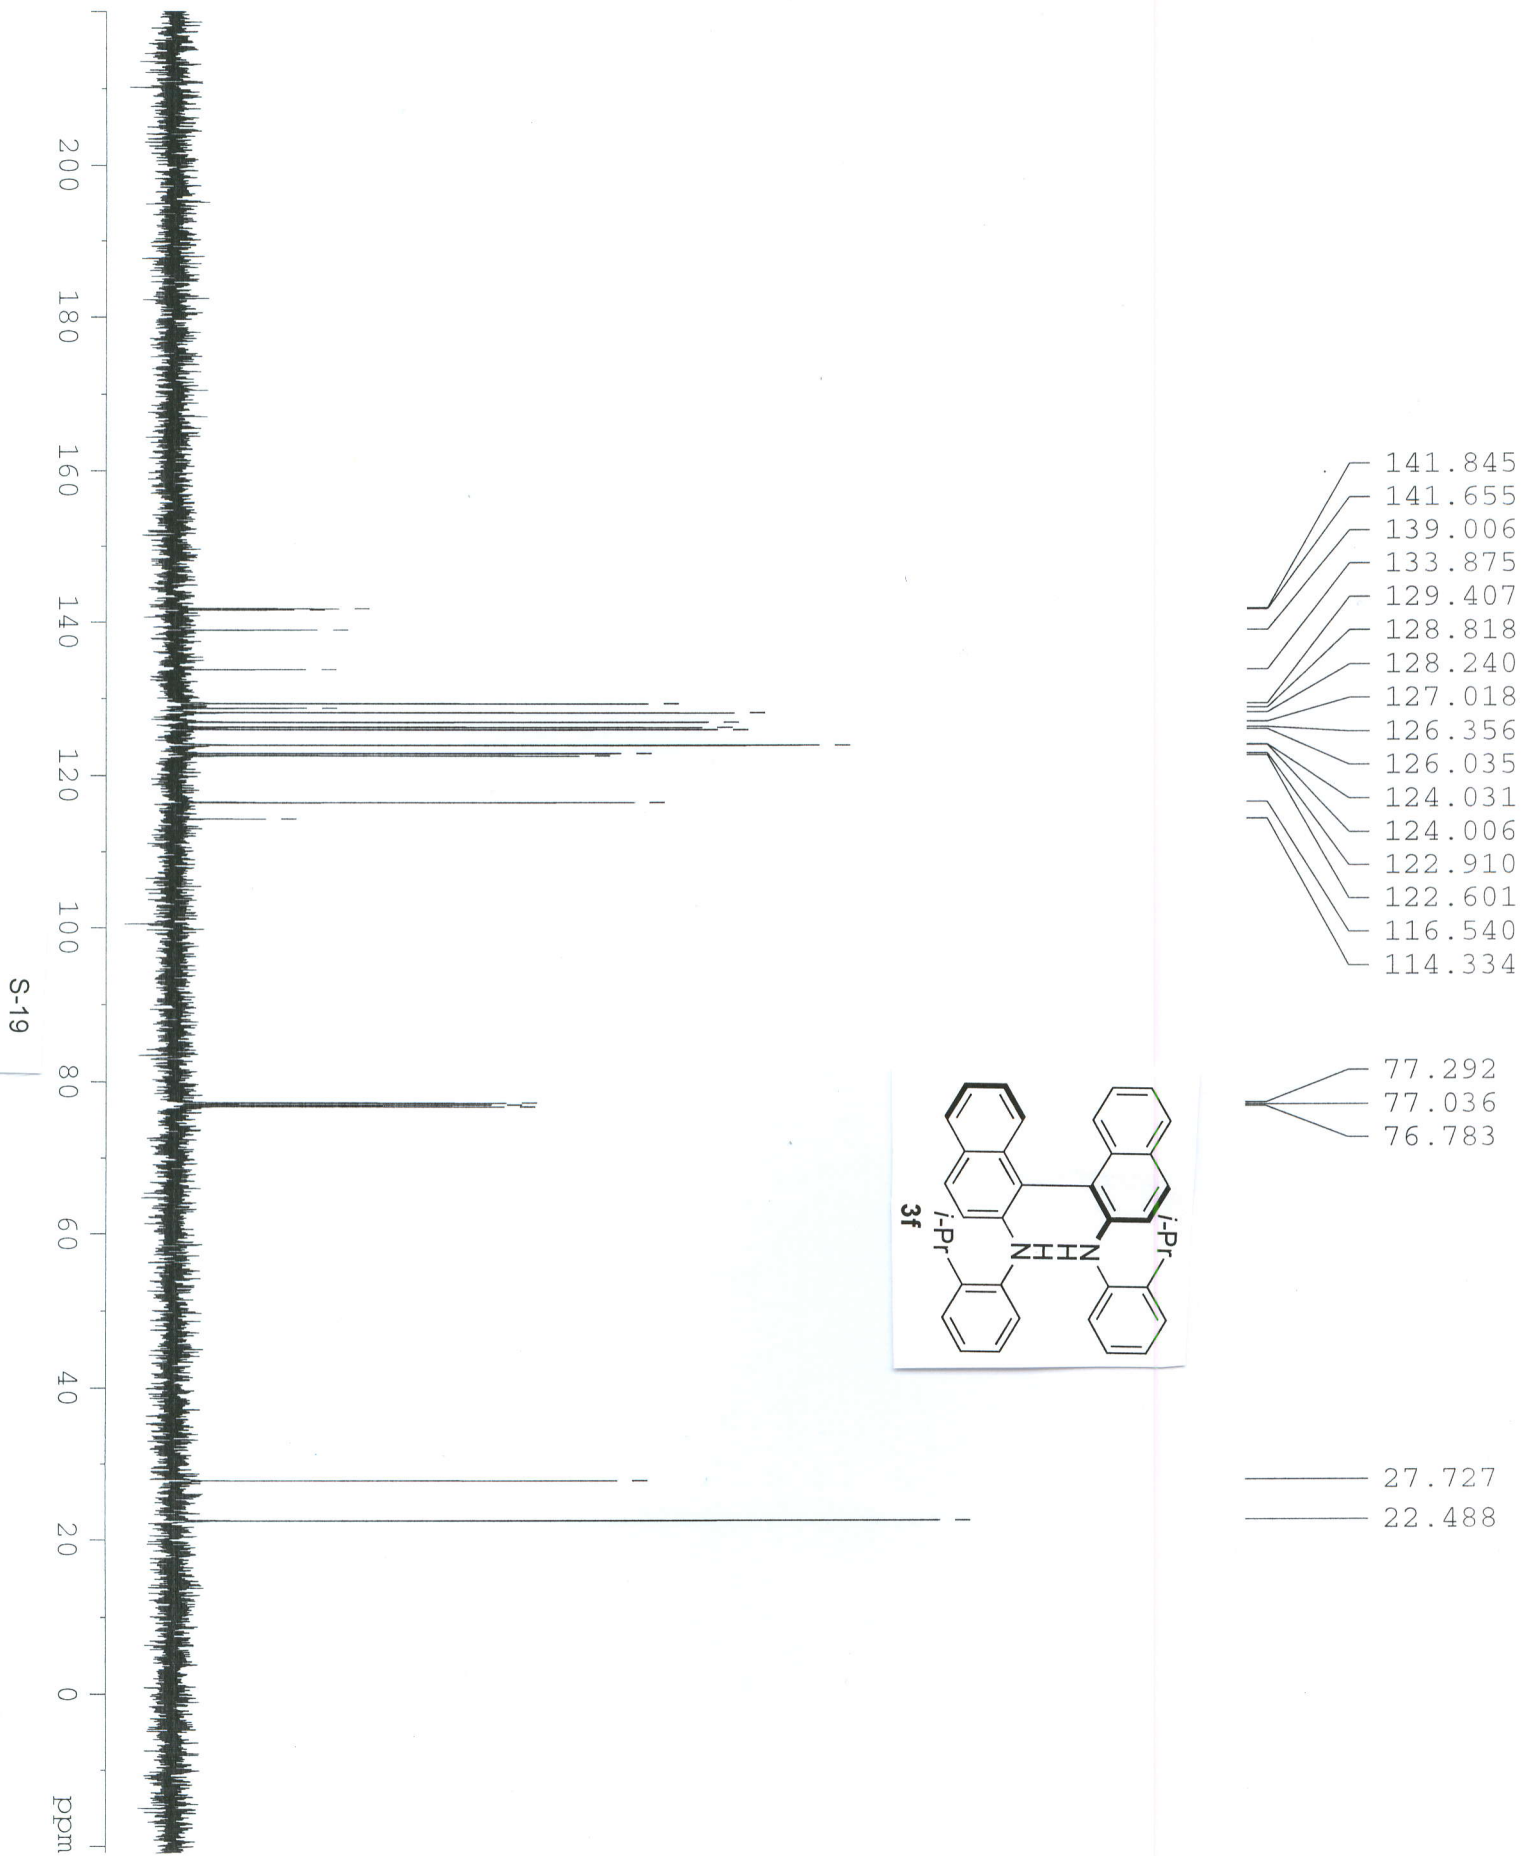

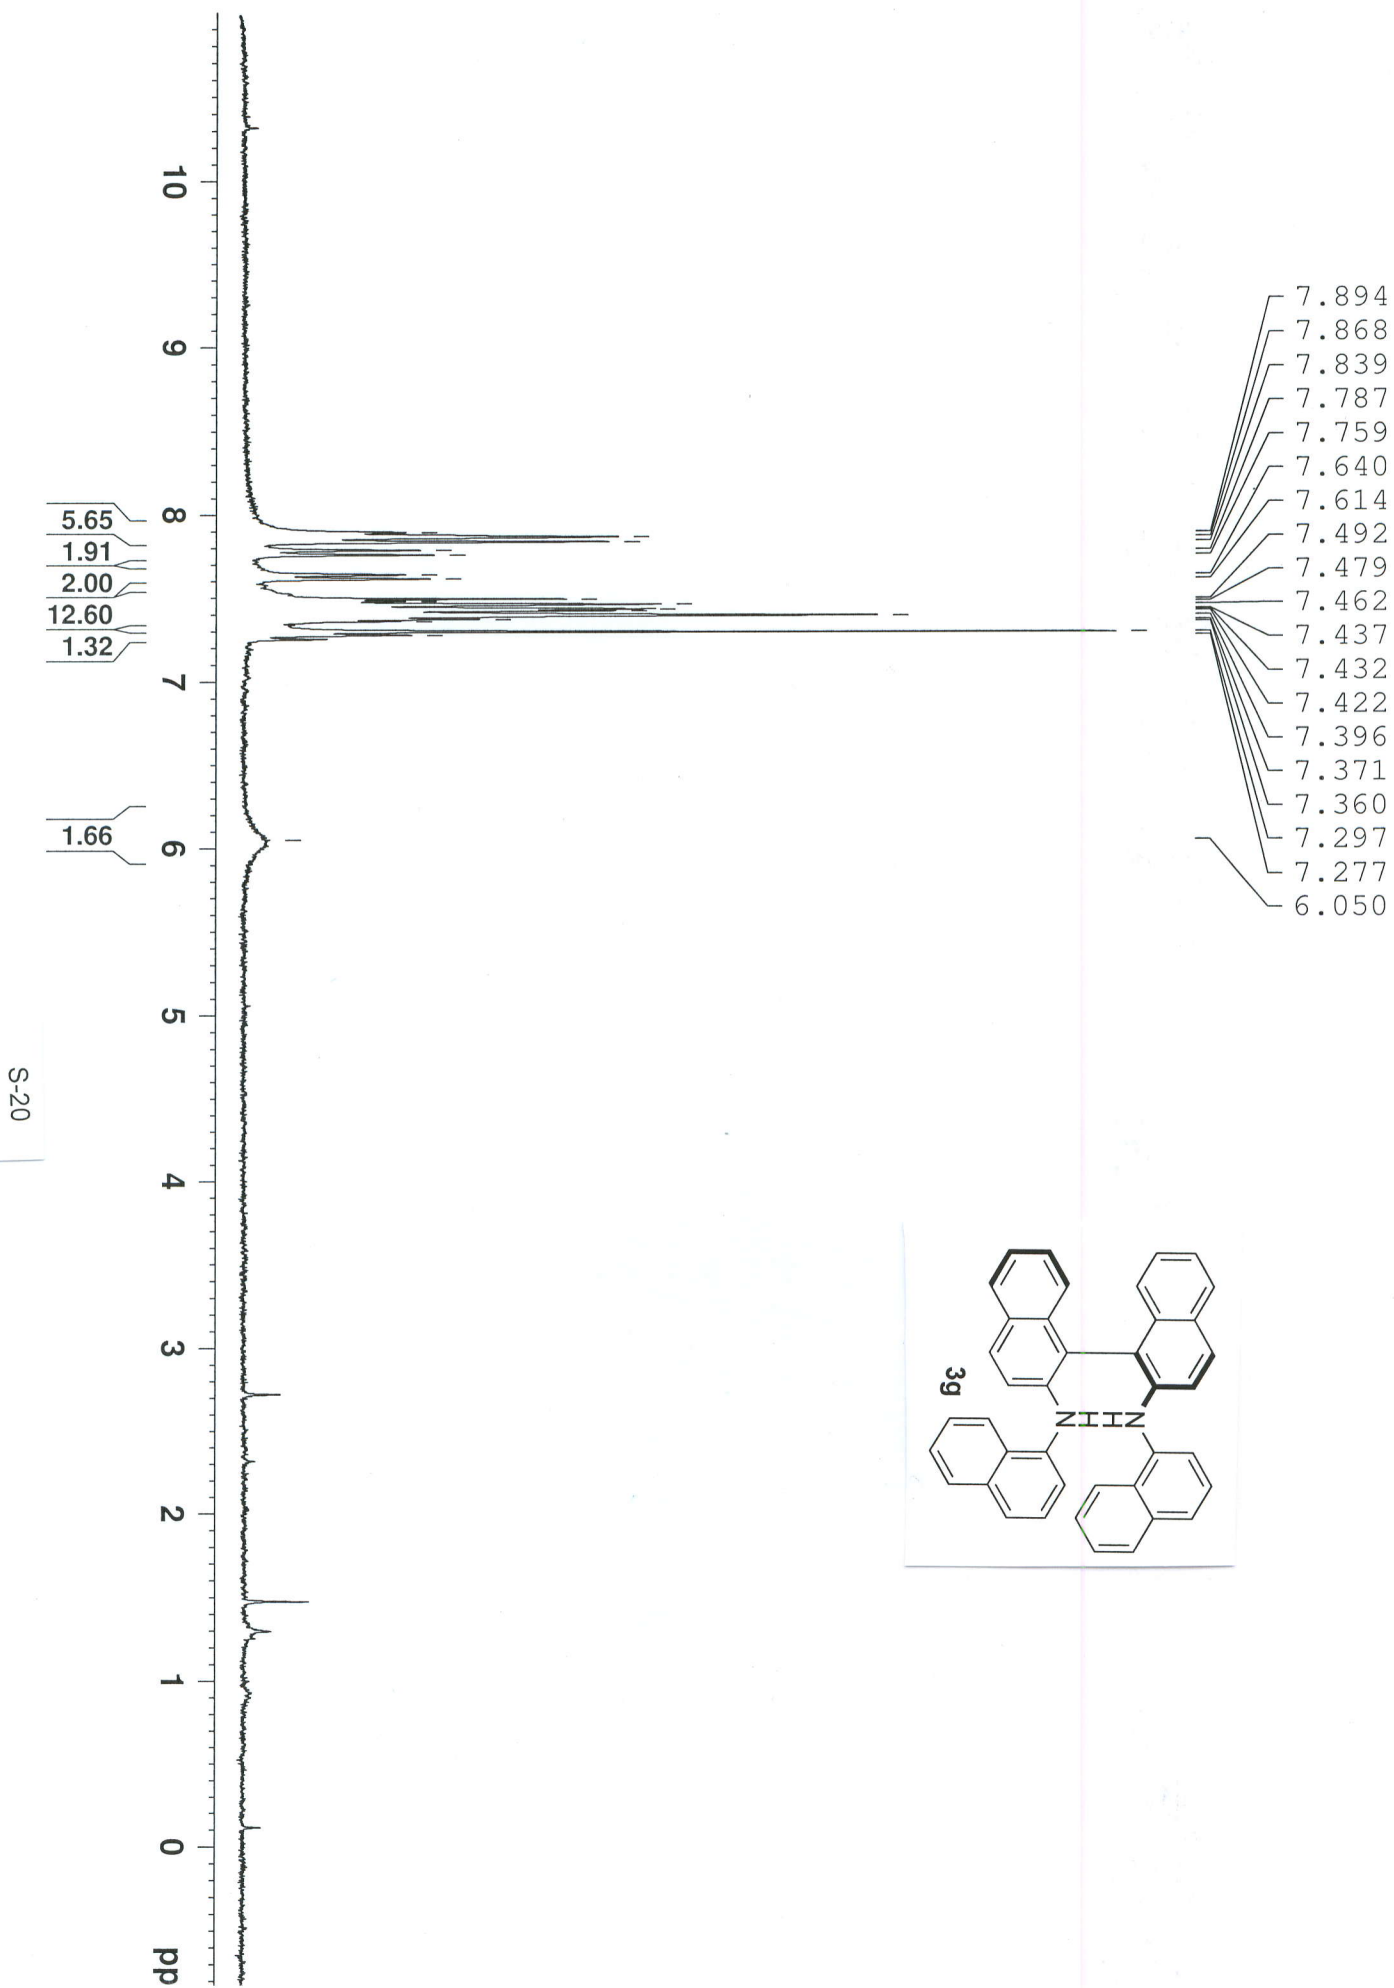

S-21

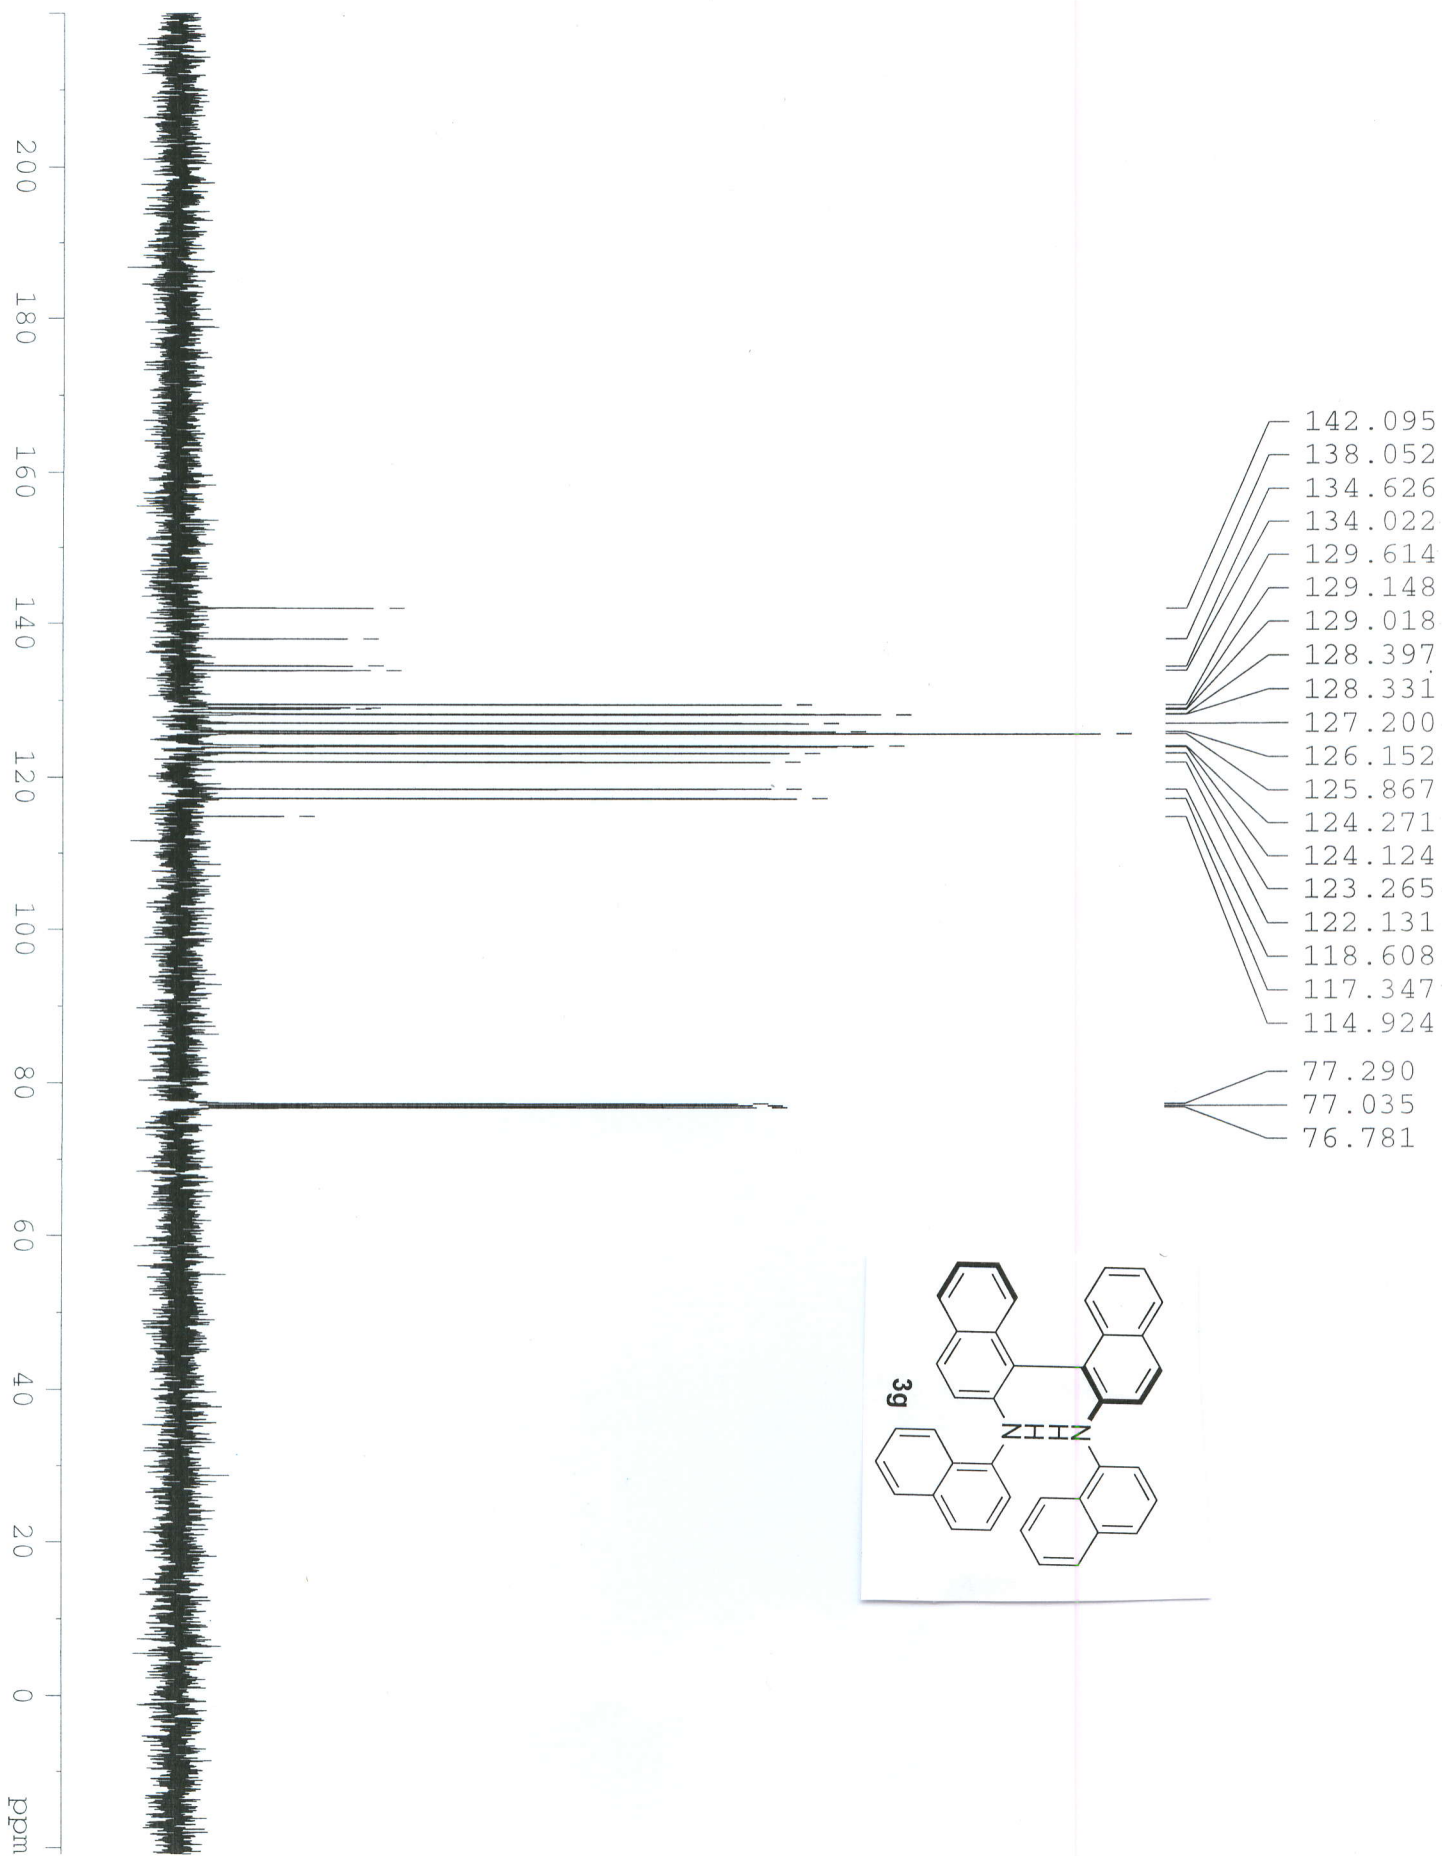

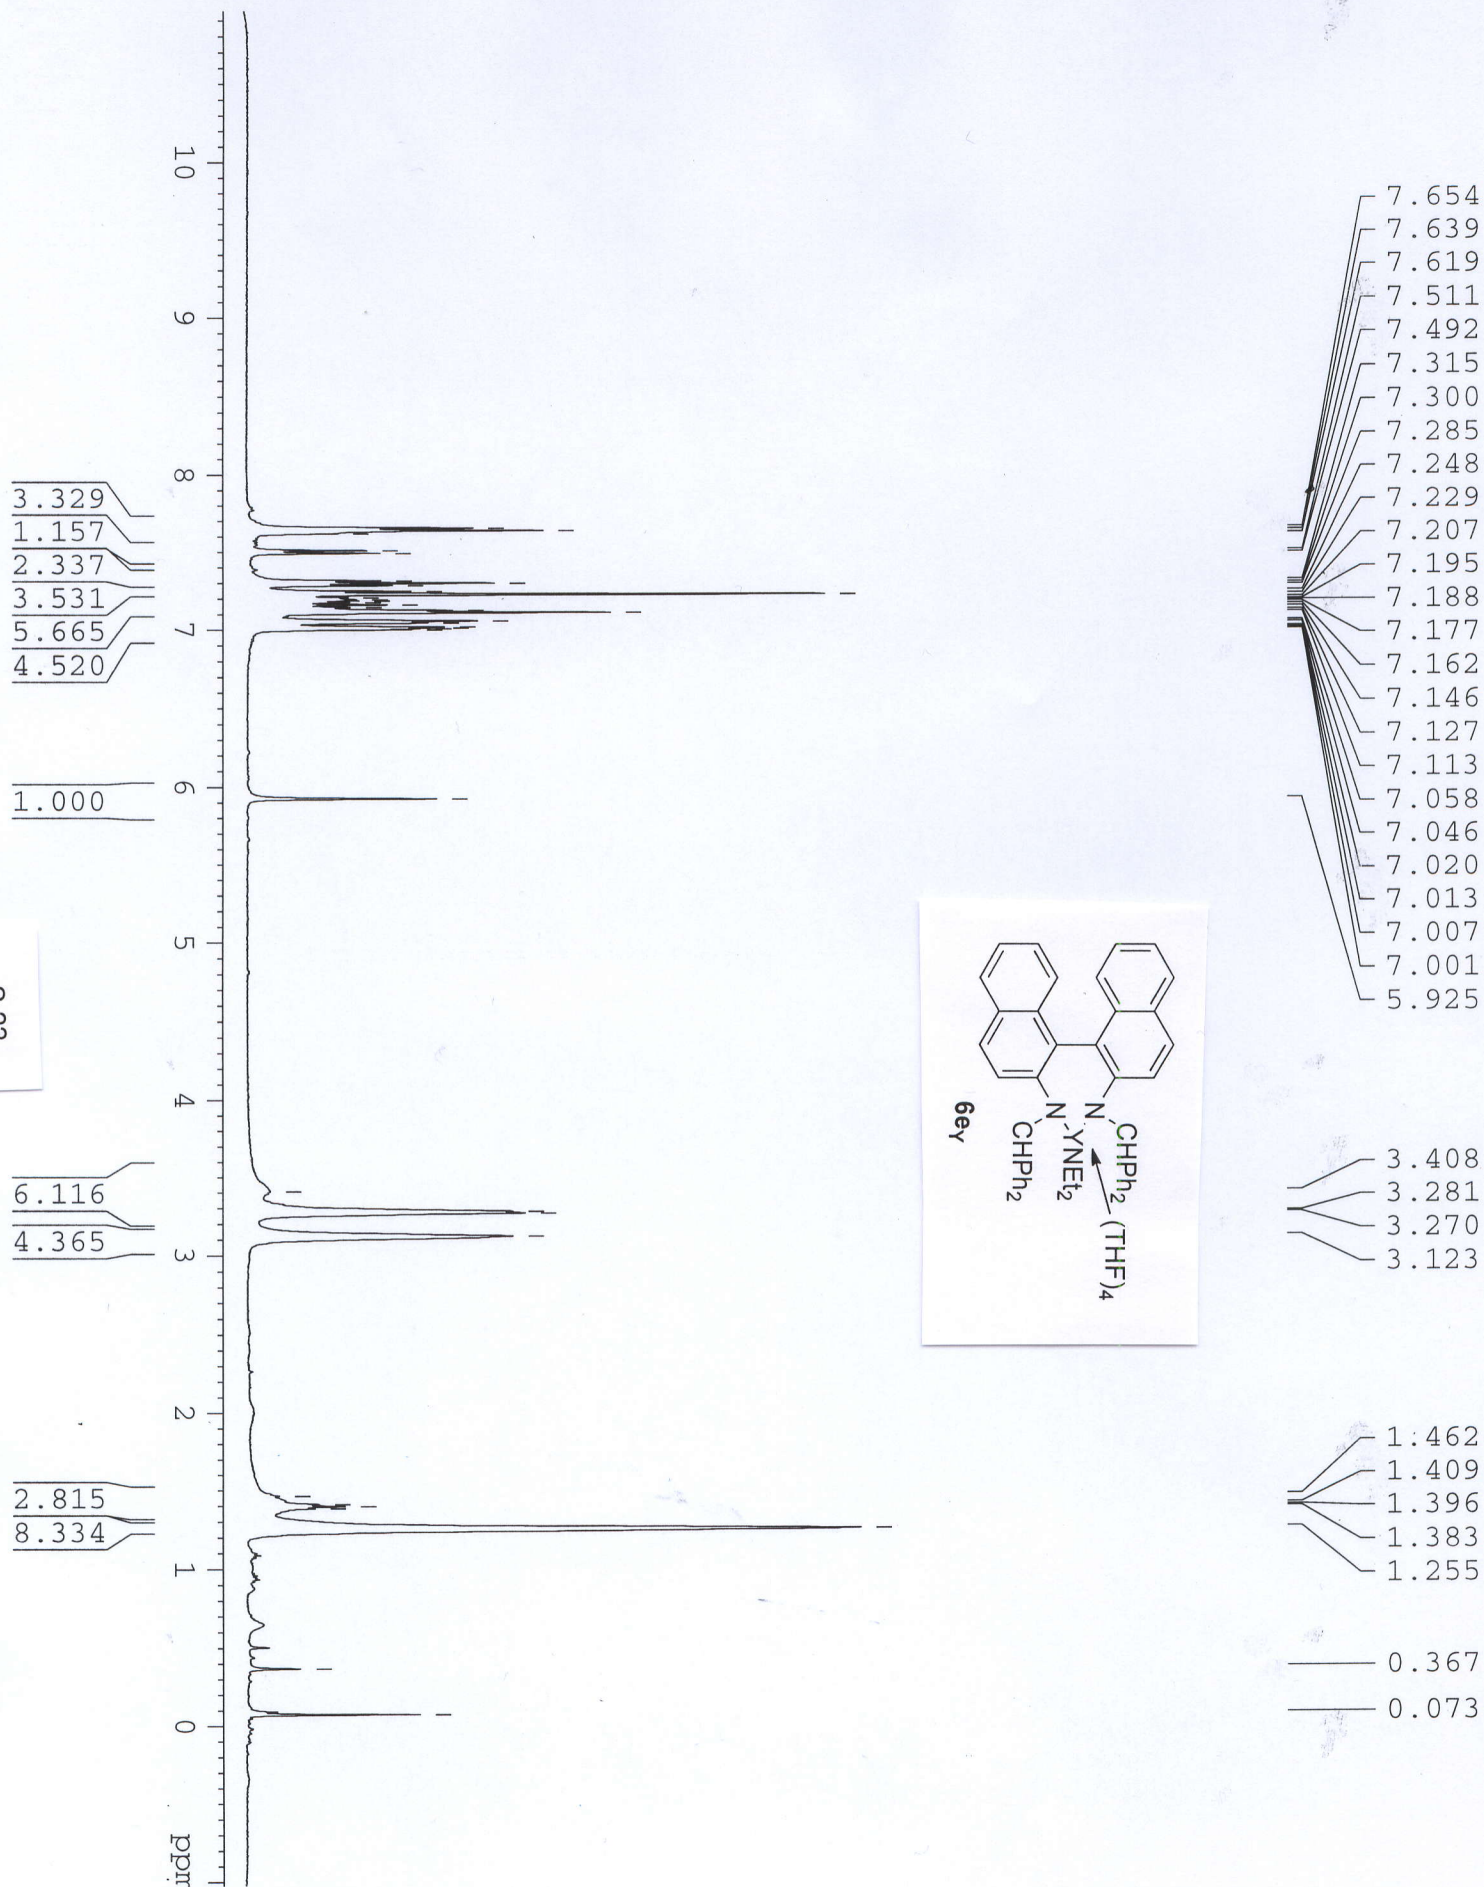

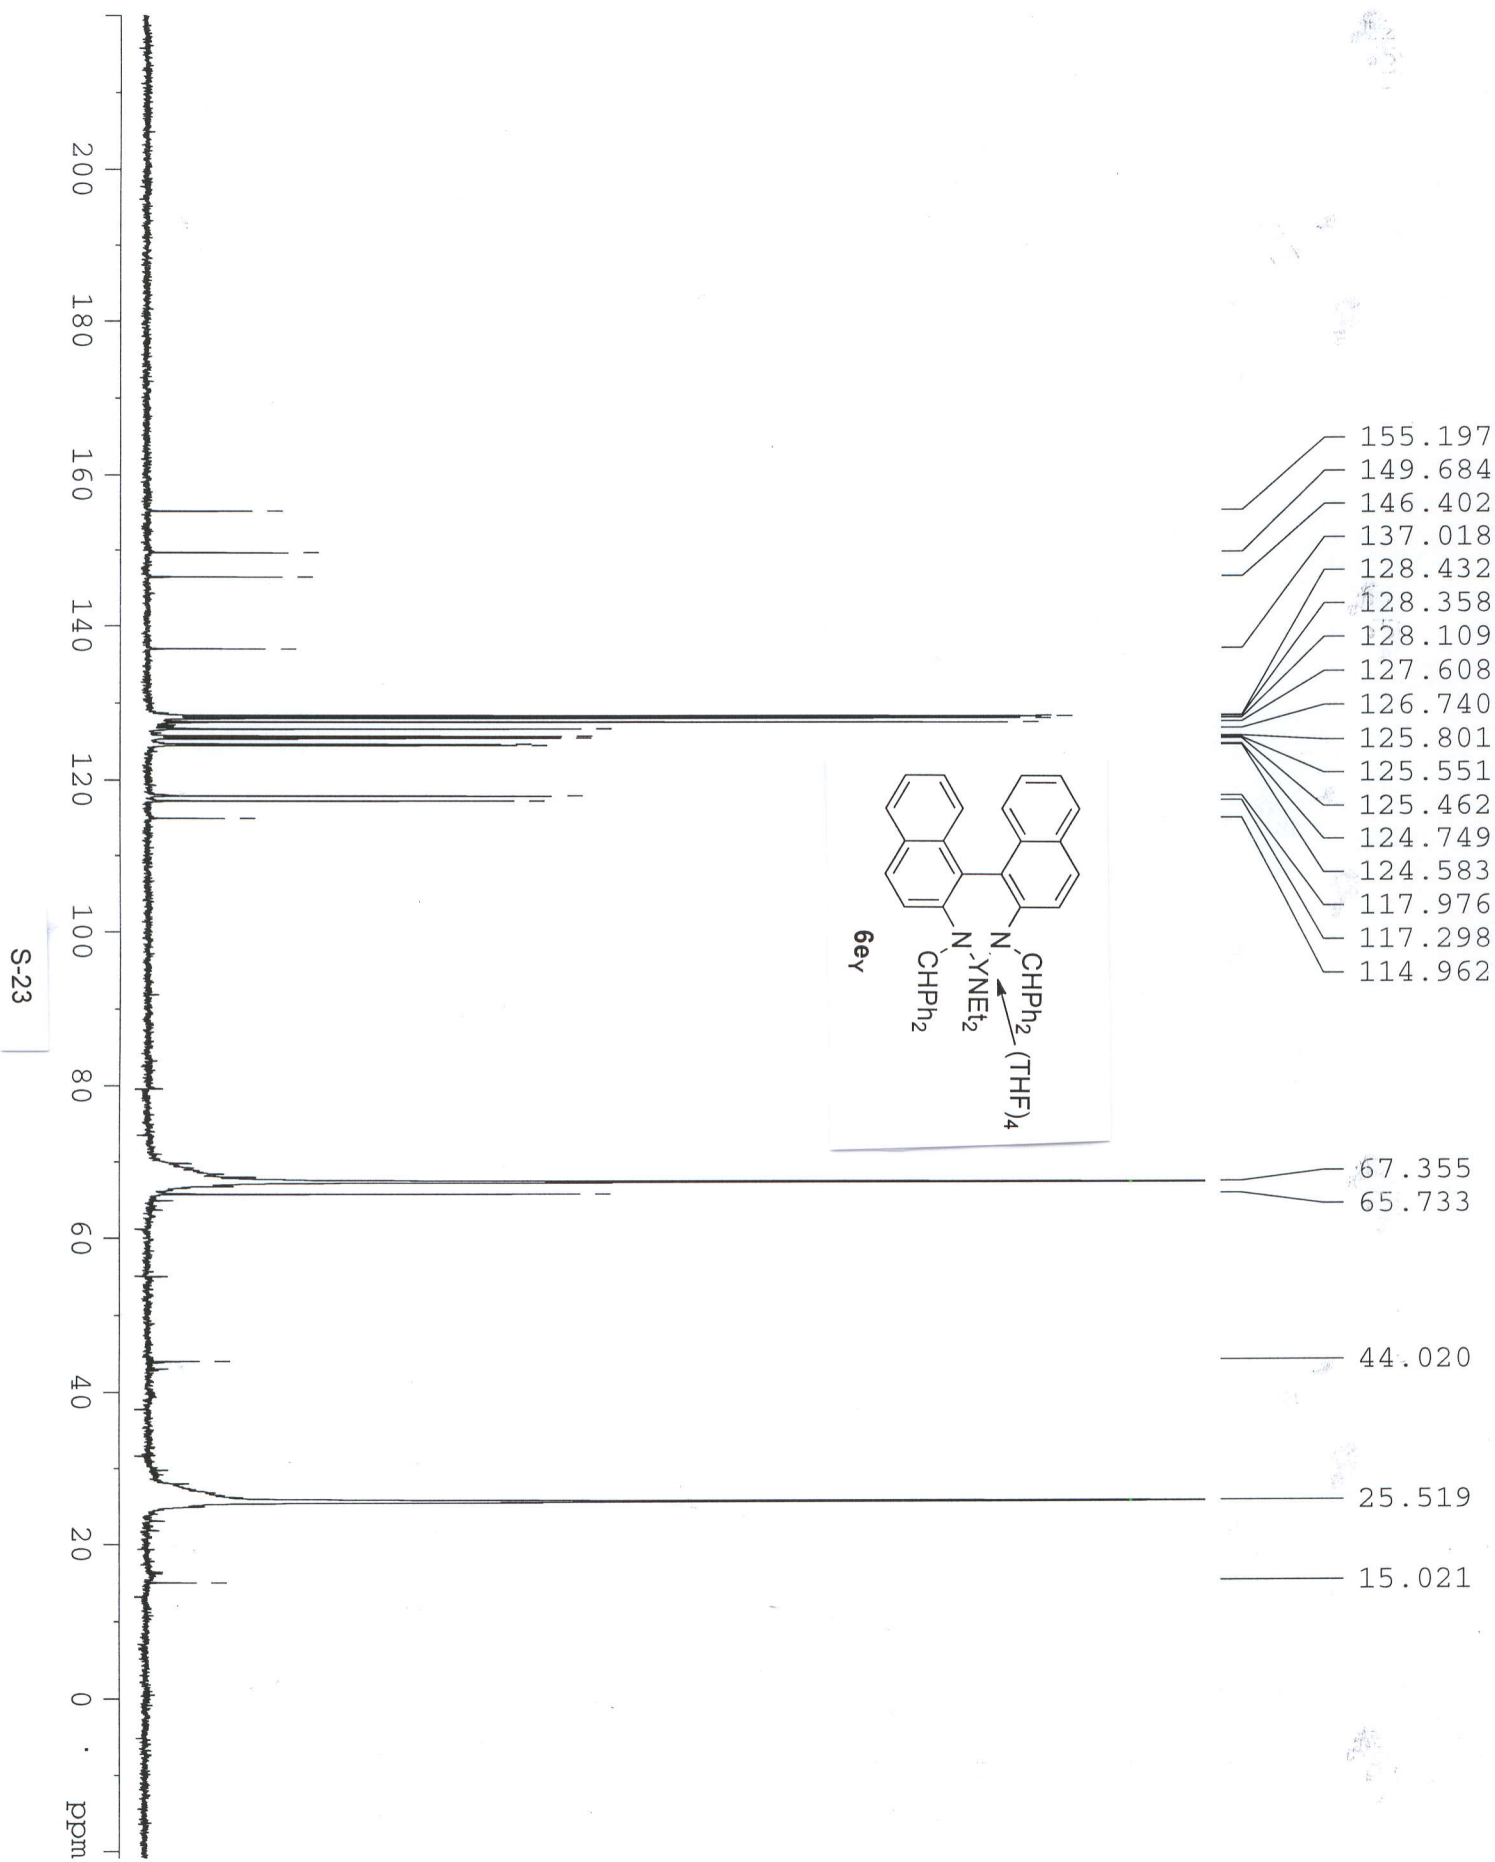

Supplement: c1dt10222b_2.pdf [file c1dt10222b_2.pdf]
